# Supplementary material for: Kat2a-Mediated Histone Lactylation Promotes Ferroptosis and Inflammation in Sepsis-Associated Lung Injury
Source: Research Square preprint supplement (doi:10.21203/rs.3.rs-8069085/v1), 2025-12-04

**Unedited original gel diagram for Figure1-B** WB was conducted to evaluate Kat2a protein levels


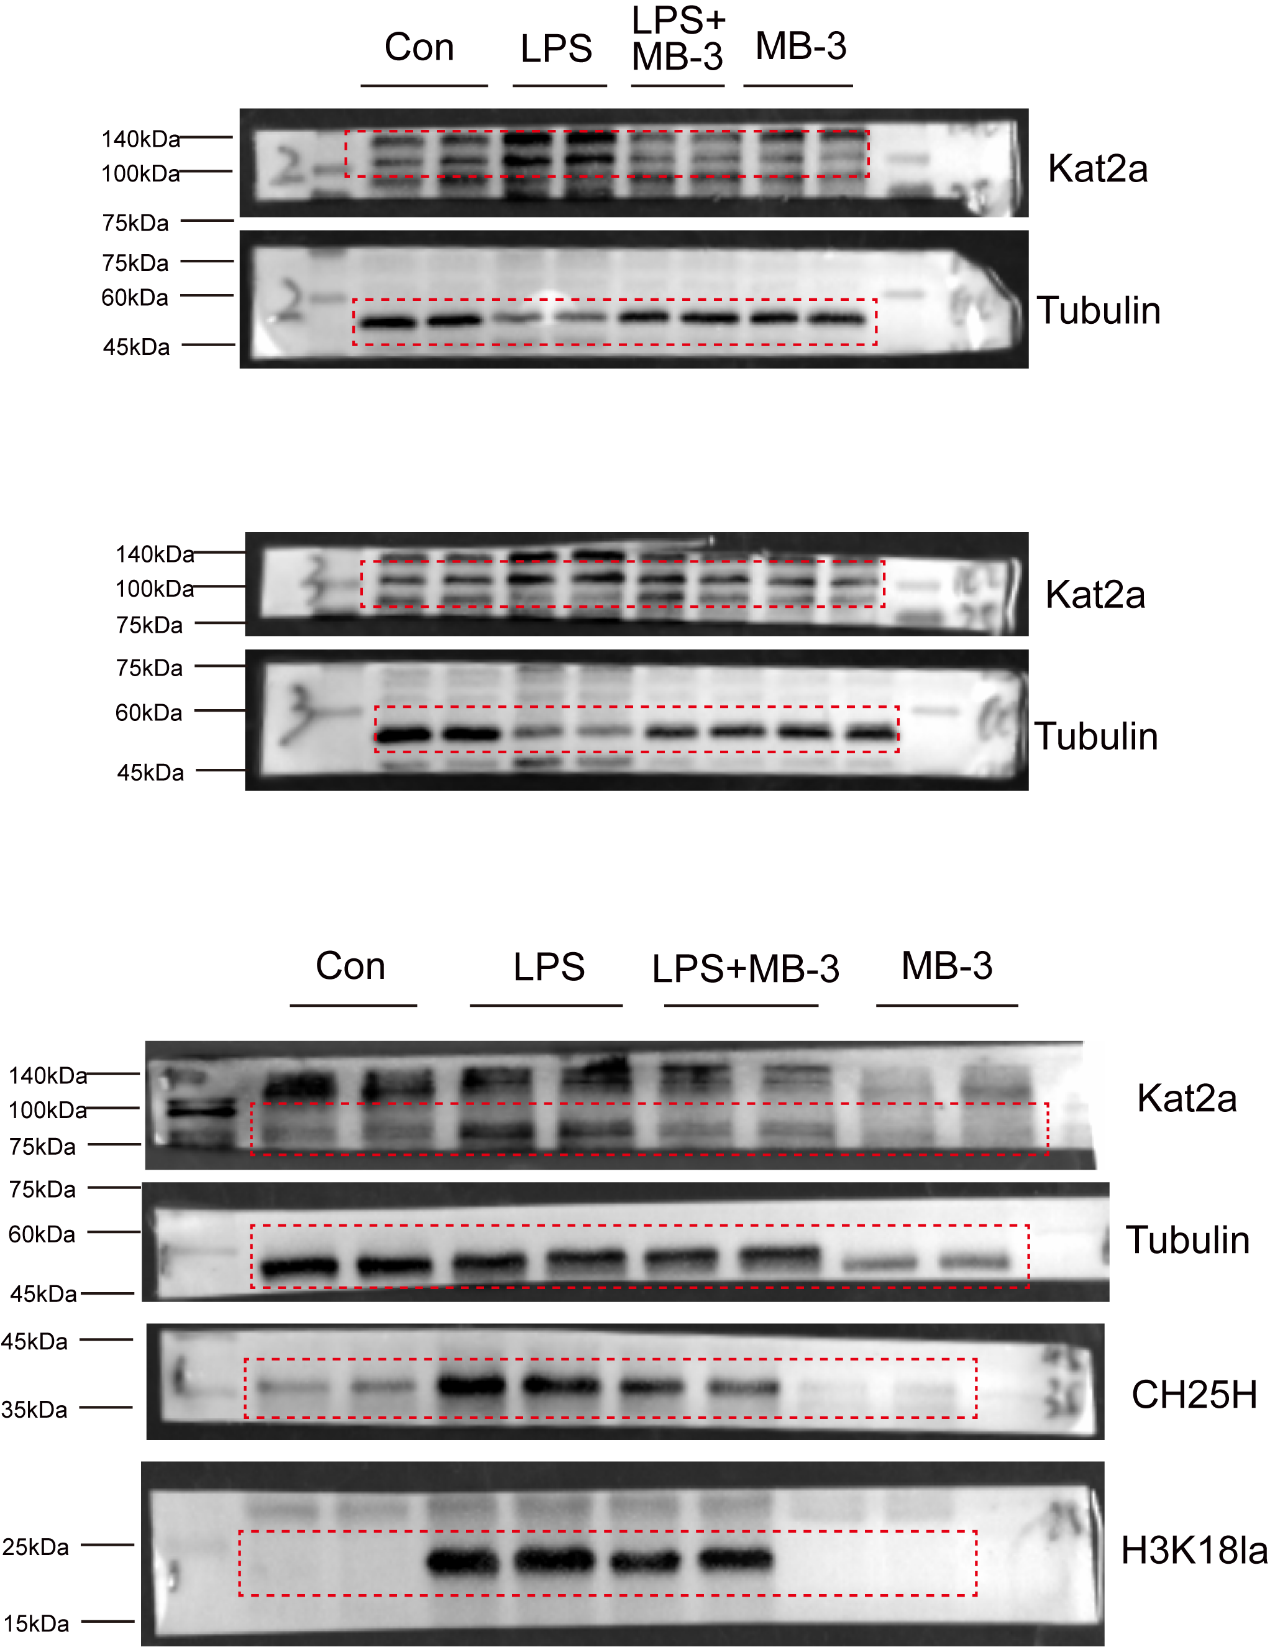


**Unedited original gel diagram for Figure1-C** WB was conducted to evaluate Pan-Kla protein levels


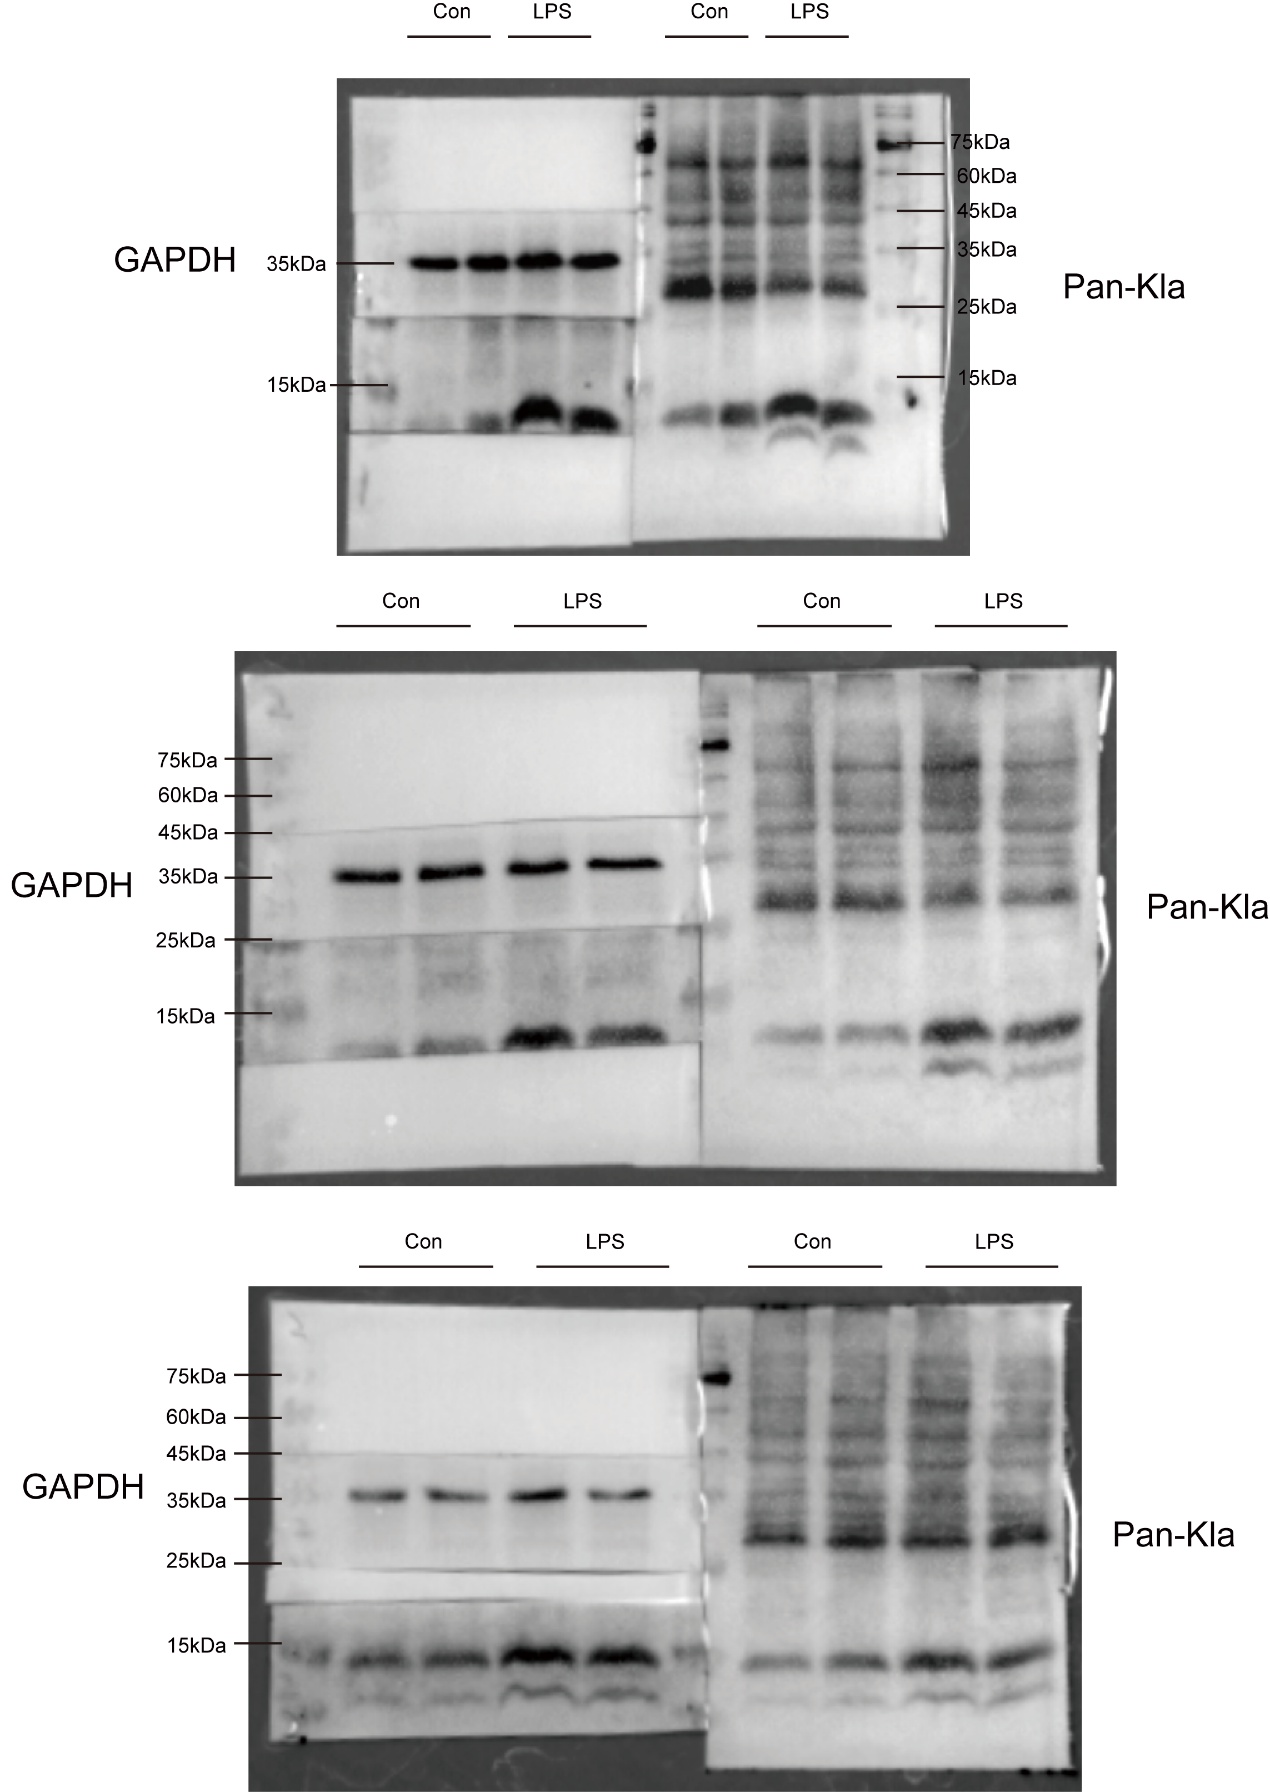


**Unedited original gel diagram for Figure1-E, Figure 6-F** WB was conducted to evaluate H3K18la protein levels


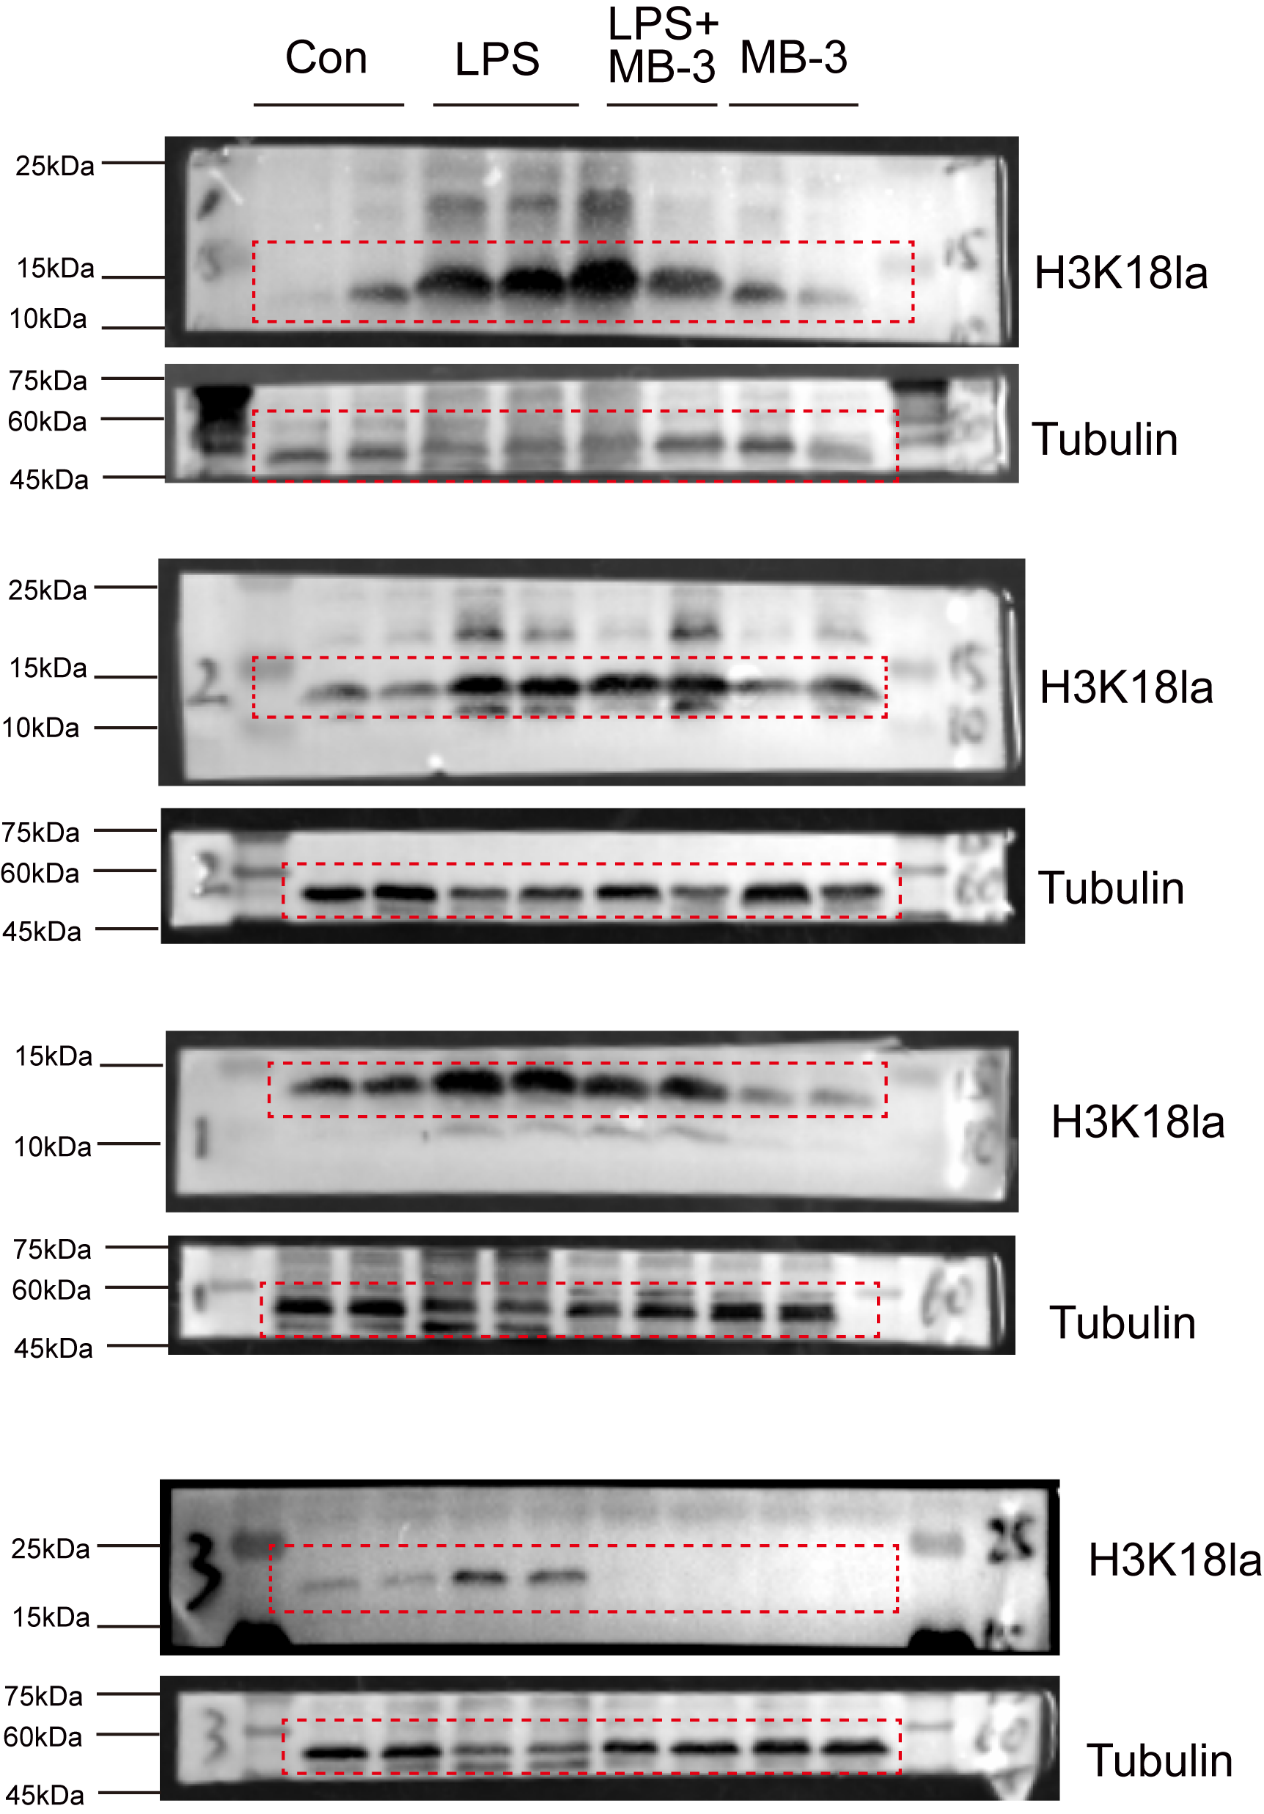


**Unedited original gel diagram for Figure1-F** WB was conducted to evaluate Kat2a protein levels


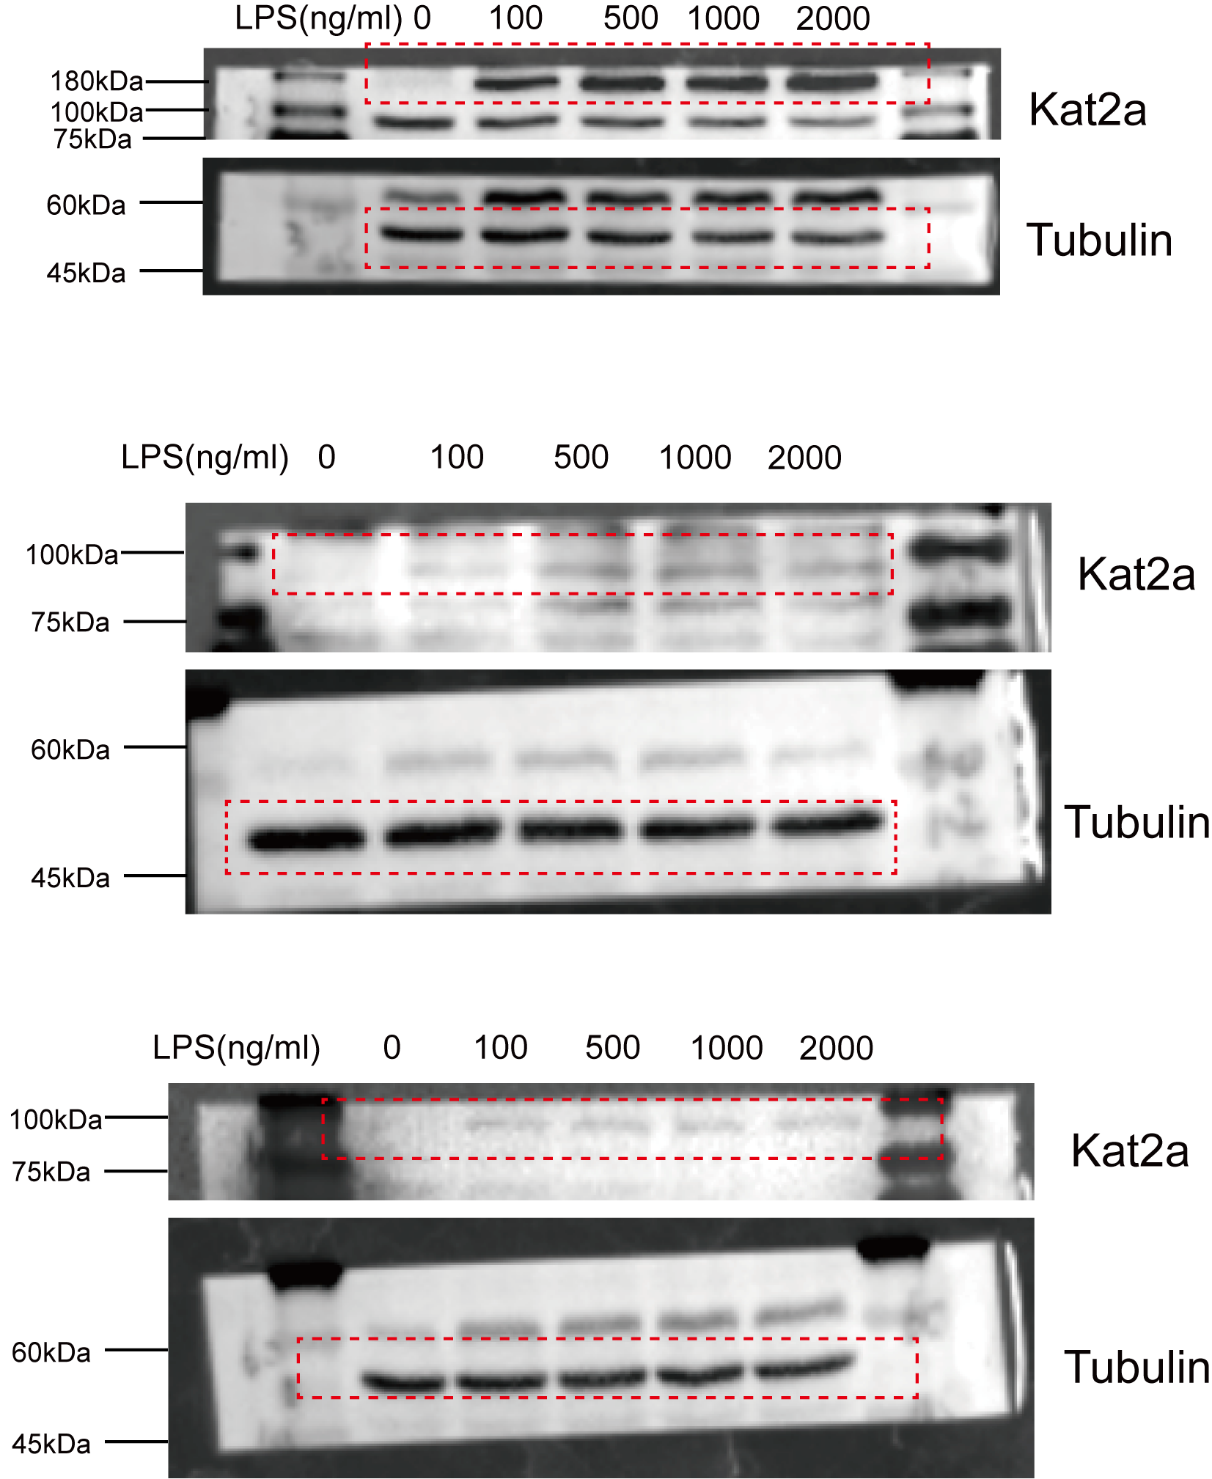


**Unedited original gel diagram for Figure1-H, Figure 6-G** WB was conducted to evaluate H3K18la and Kat2a protein levels


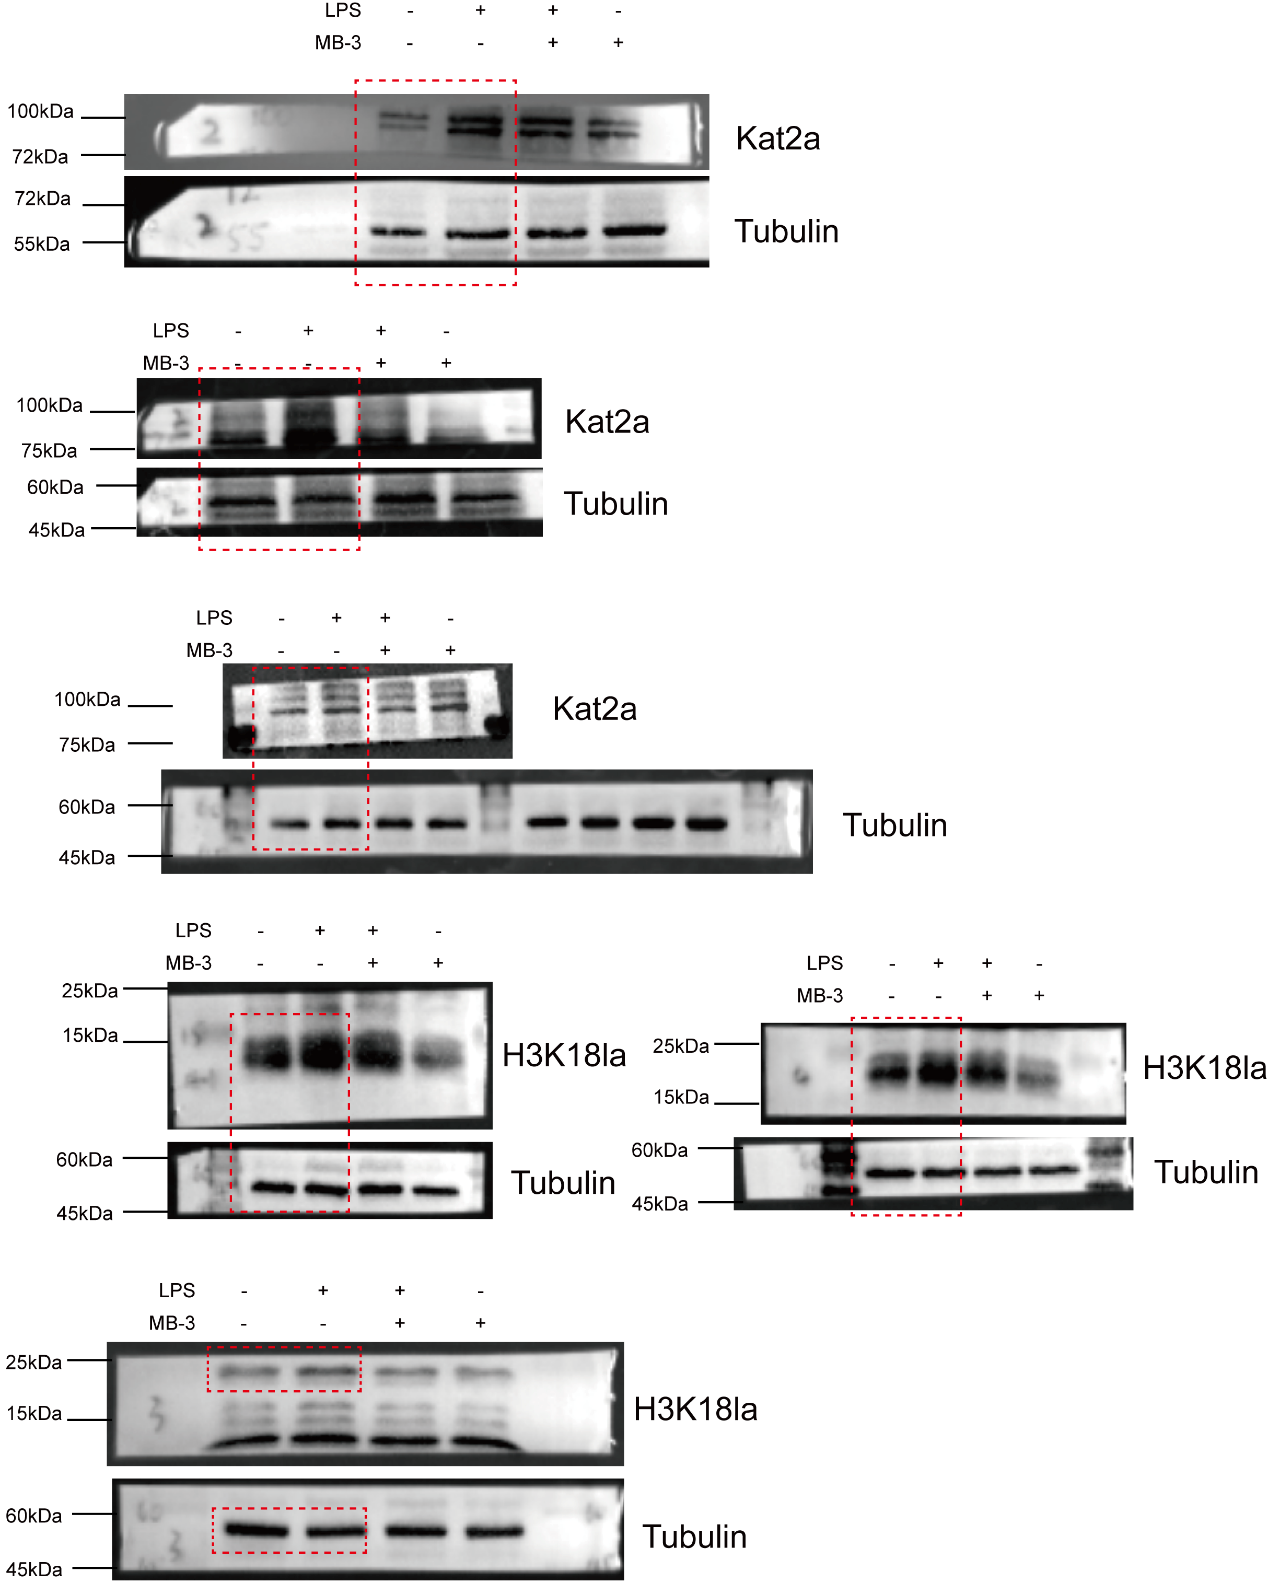


**Unedited original gel diagram for Figure3-B** WB was conducted to evaluate NLRP3、Caspase-1 and IL-1β protein levels


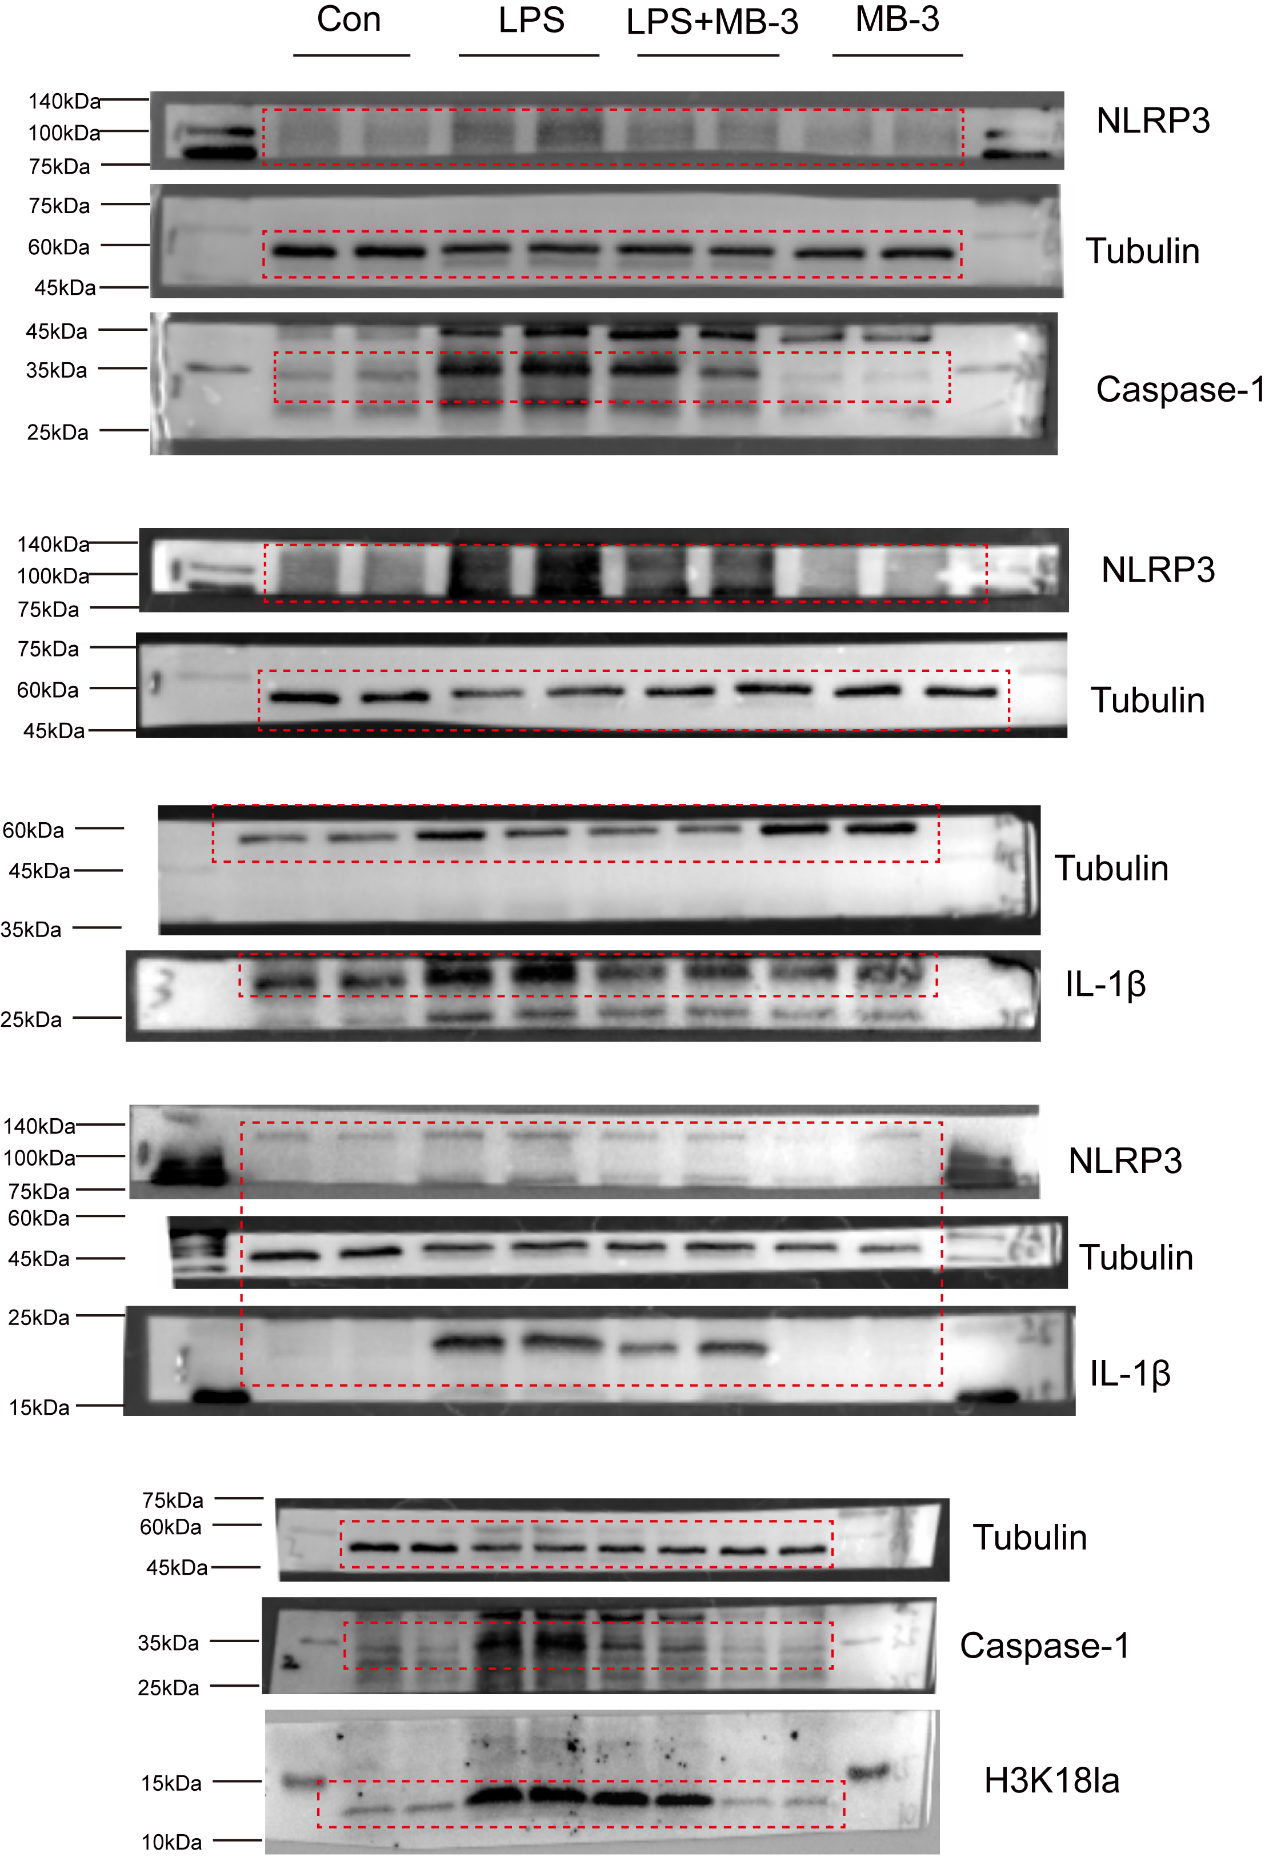


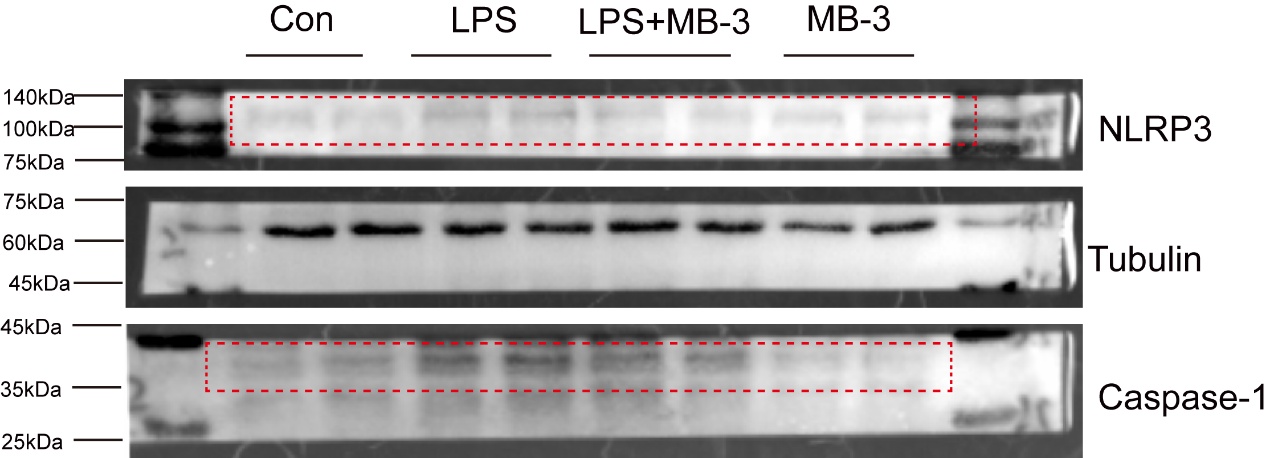


**Unedited original gel diagram for Figure3-F and J** WB was conducted to evaluate NLRP3、Caspase-1 、IL-1β and INOS protein levels


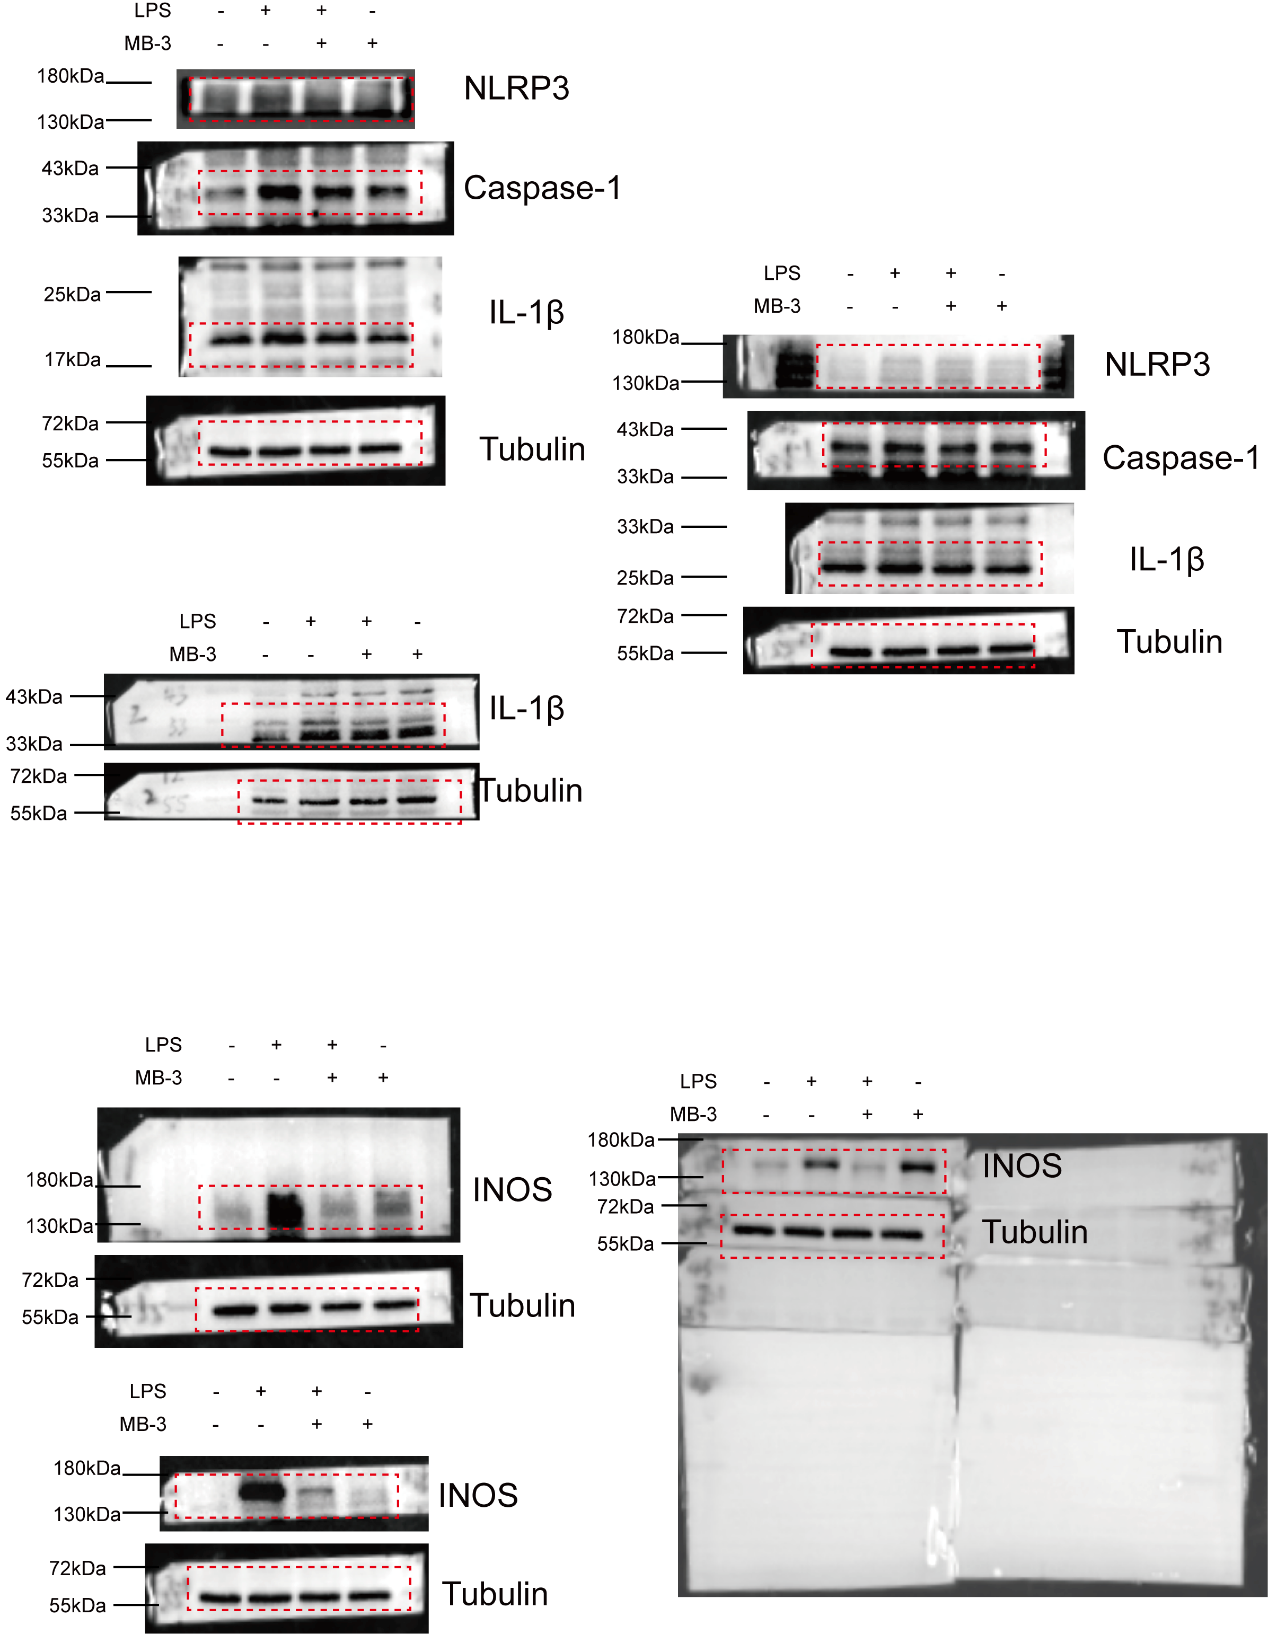


**Unedited original gel diagram for Figure3-M** WB was conducted to evaluate CH25H protein levels


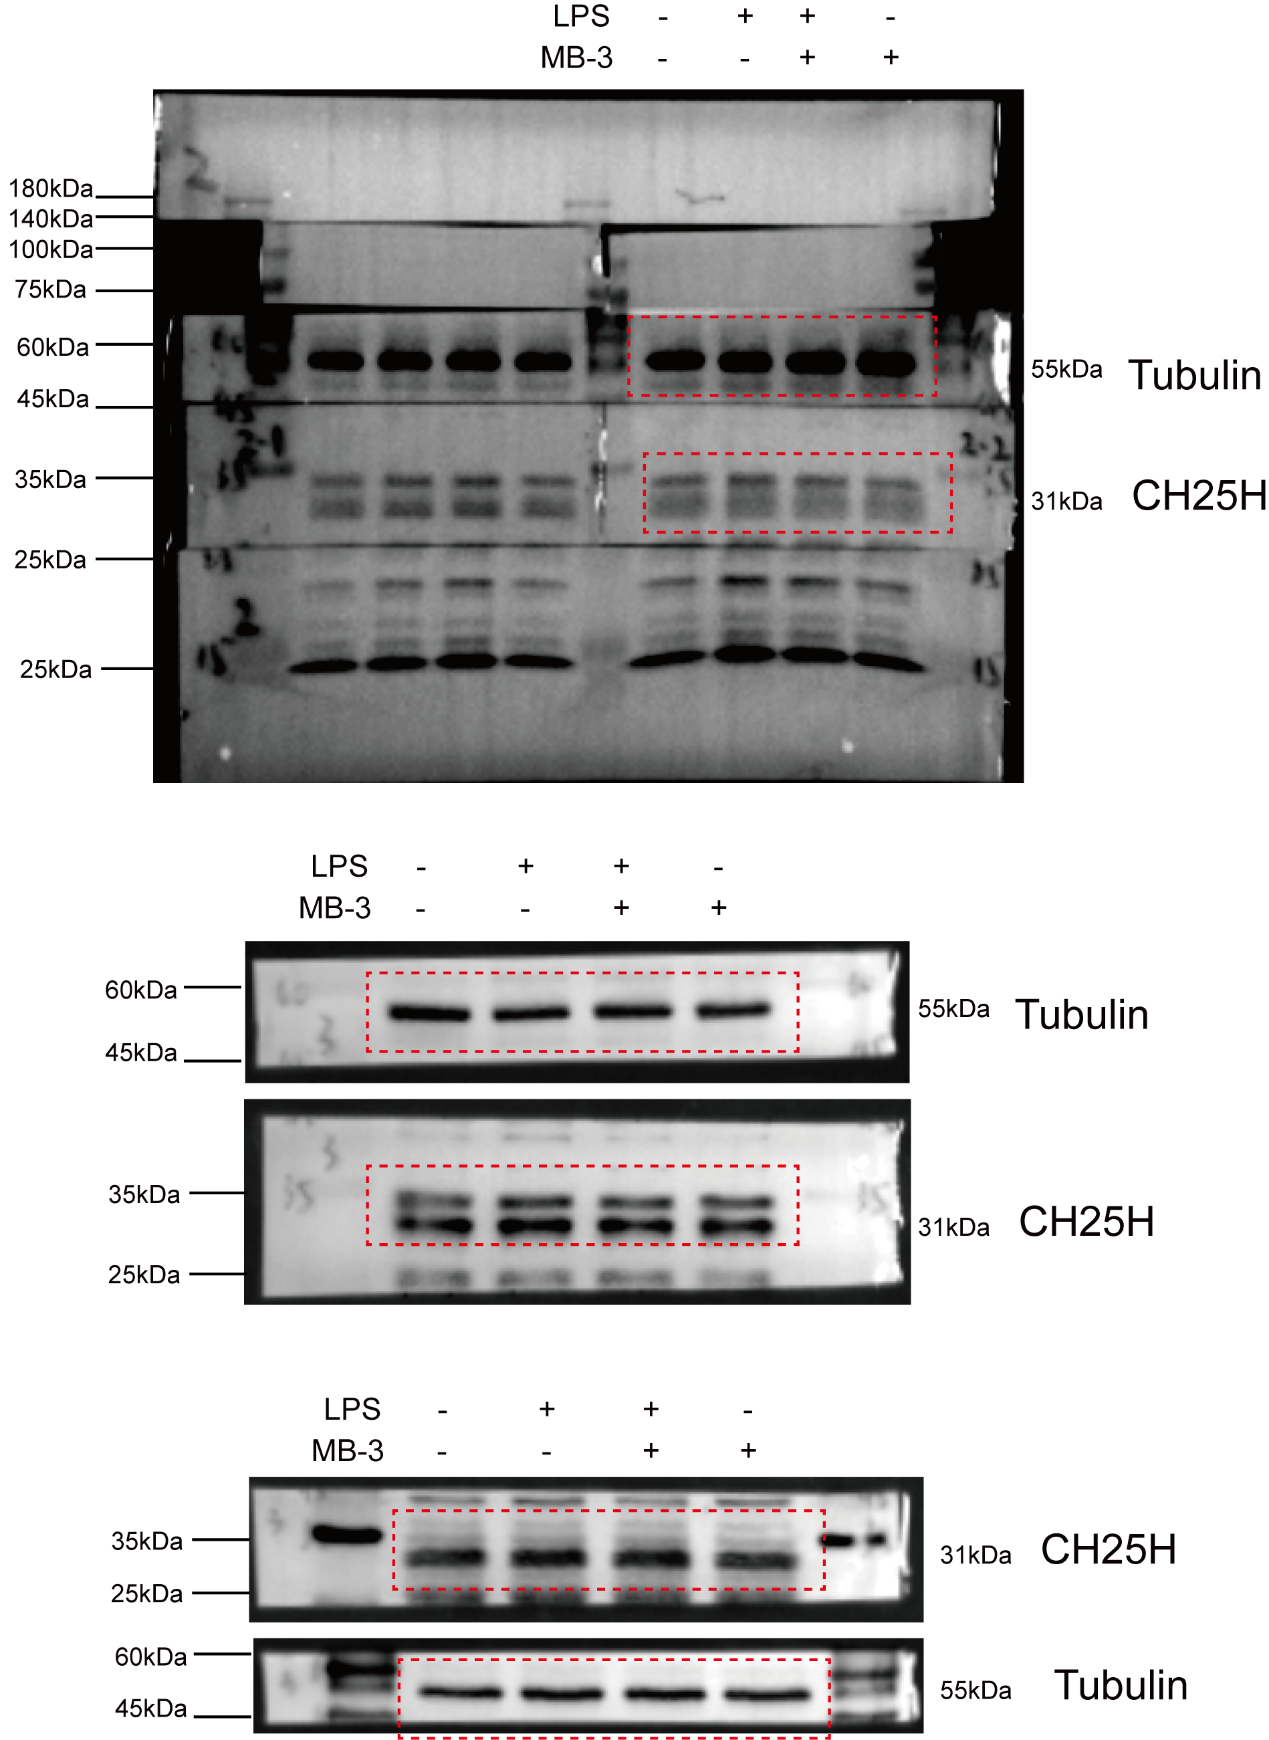


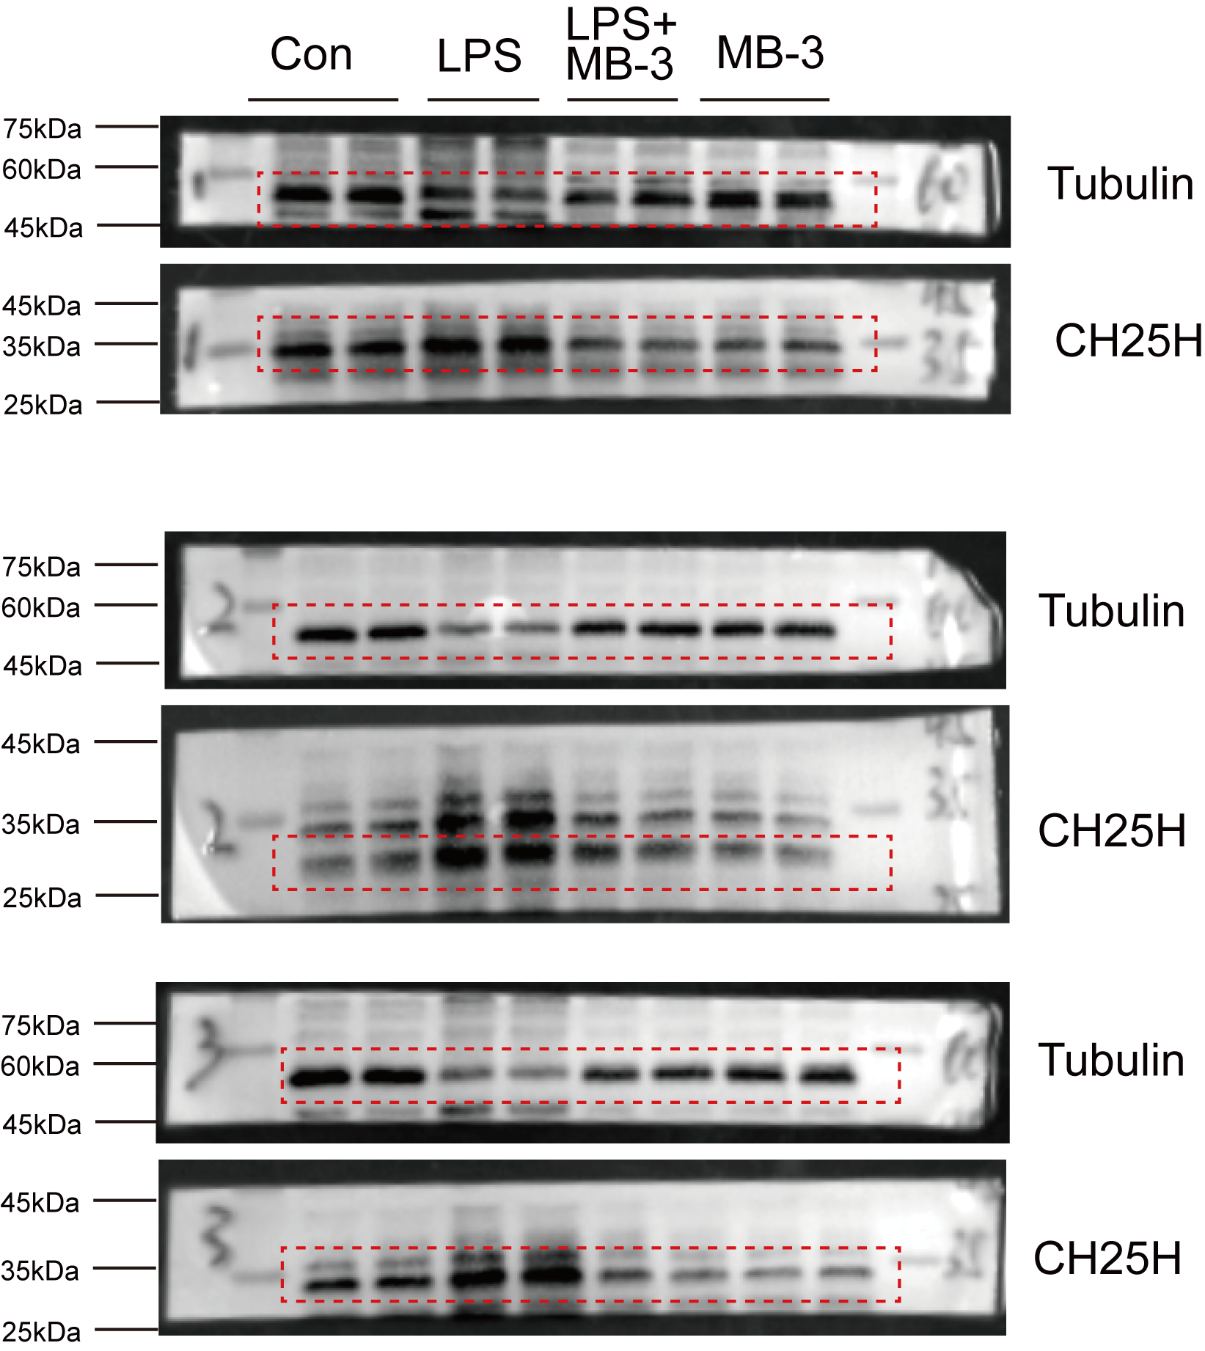


**Unedited original gel diagram for Figure4-C** WB was conducted to evaluate Slc7a11 and GPX4 protein levels


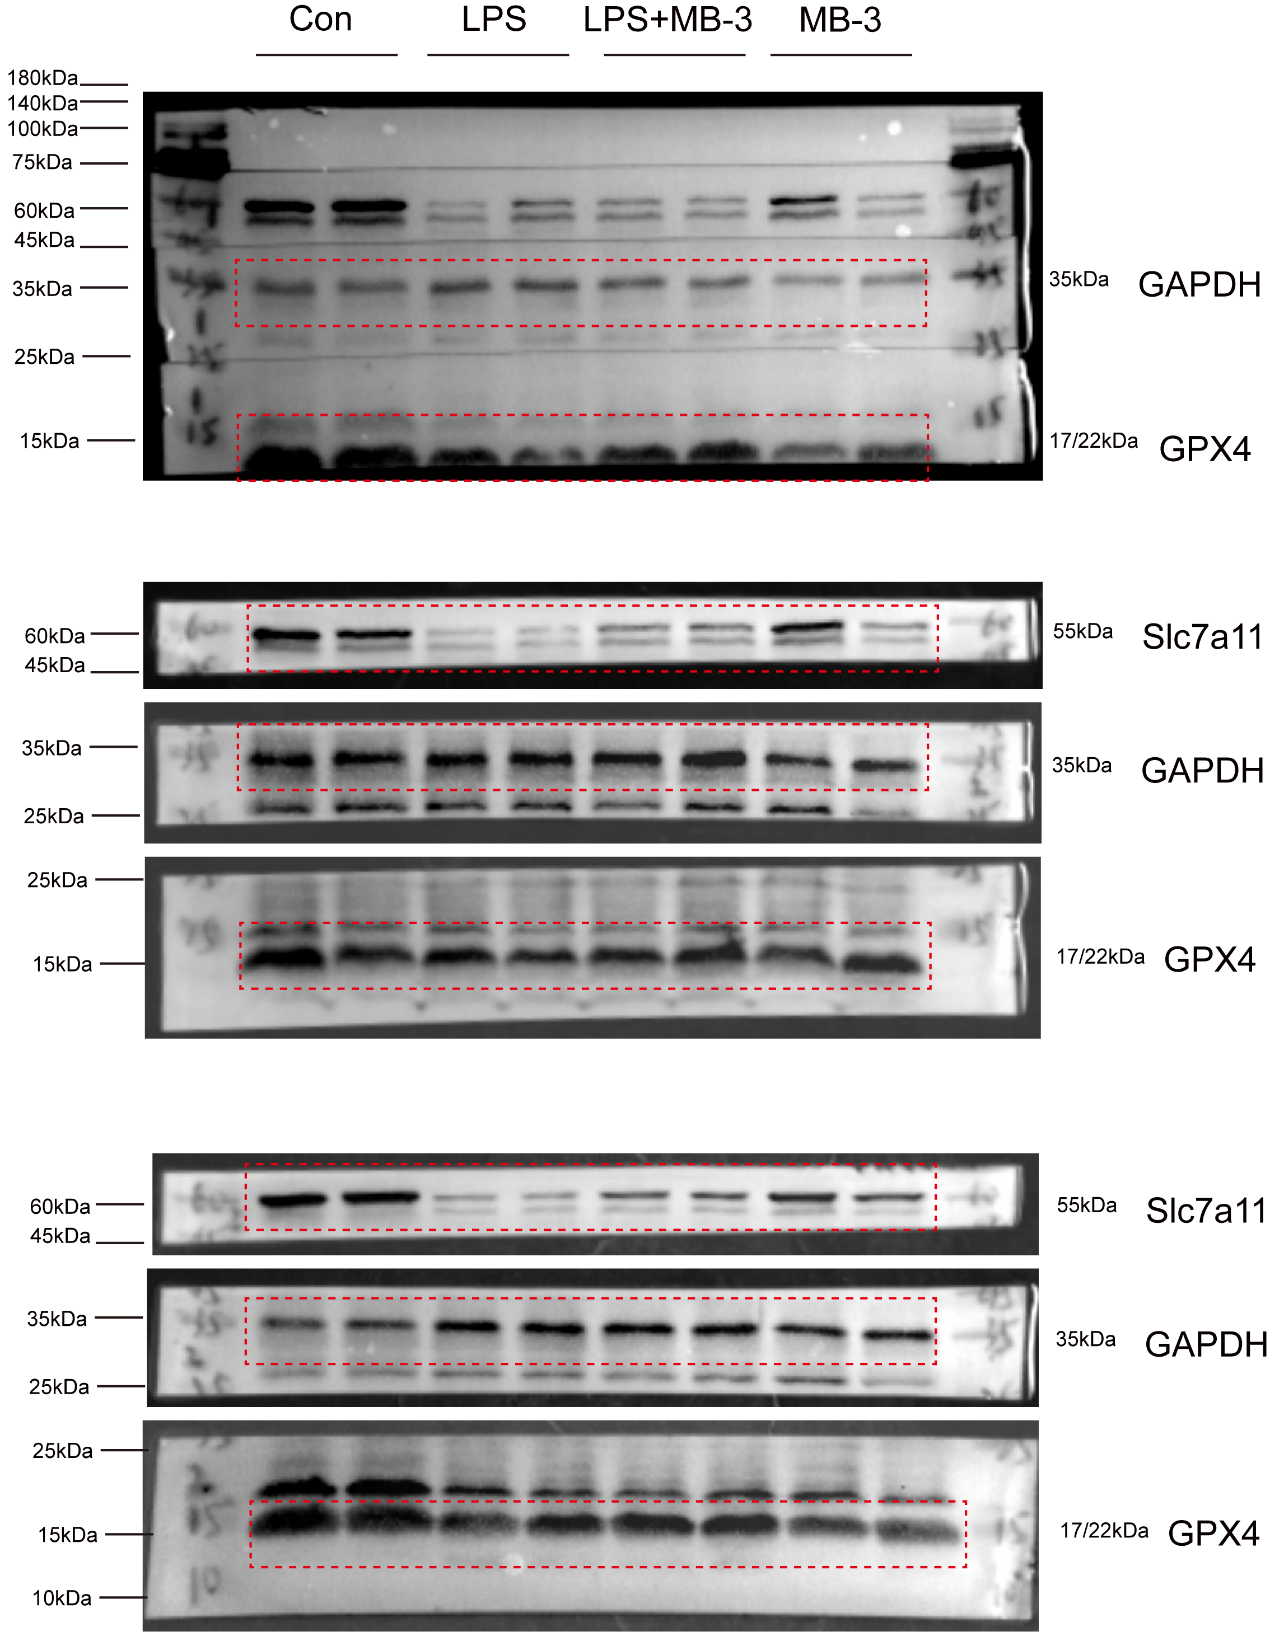


**Unedited original gel diagram for Figure4-F** WB was conducted to evaluate Tfrc、Slc7a11 and GPX4 protein levels


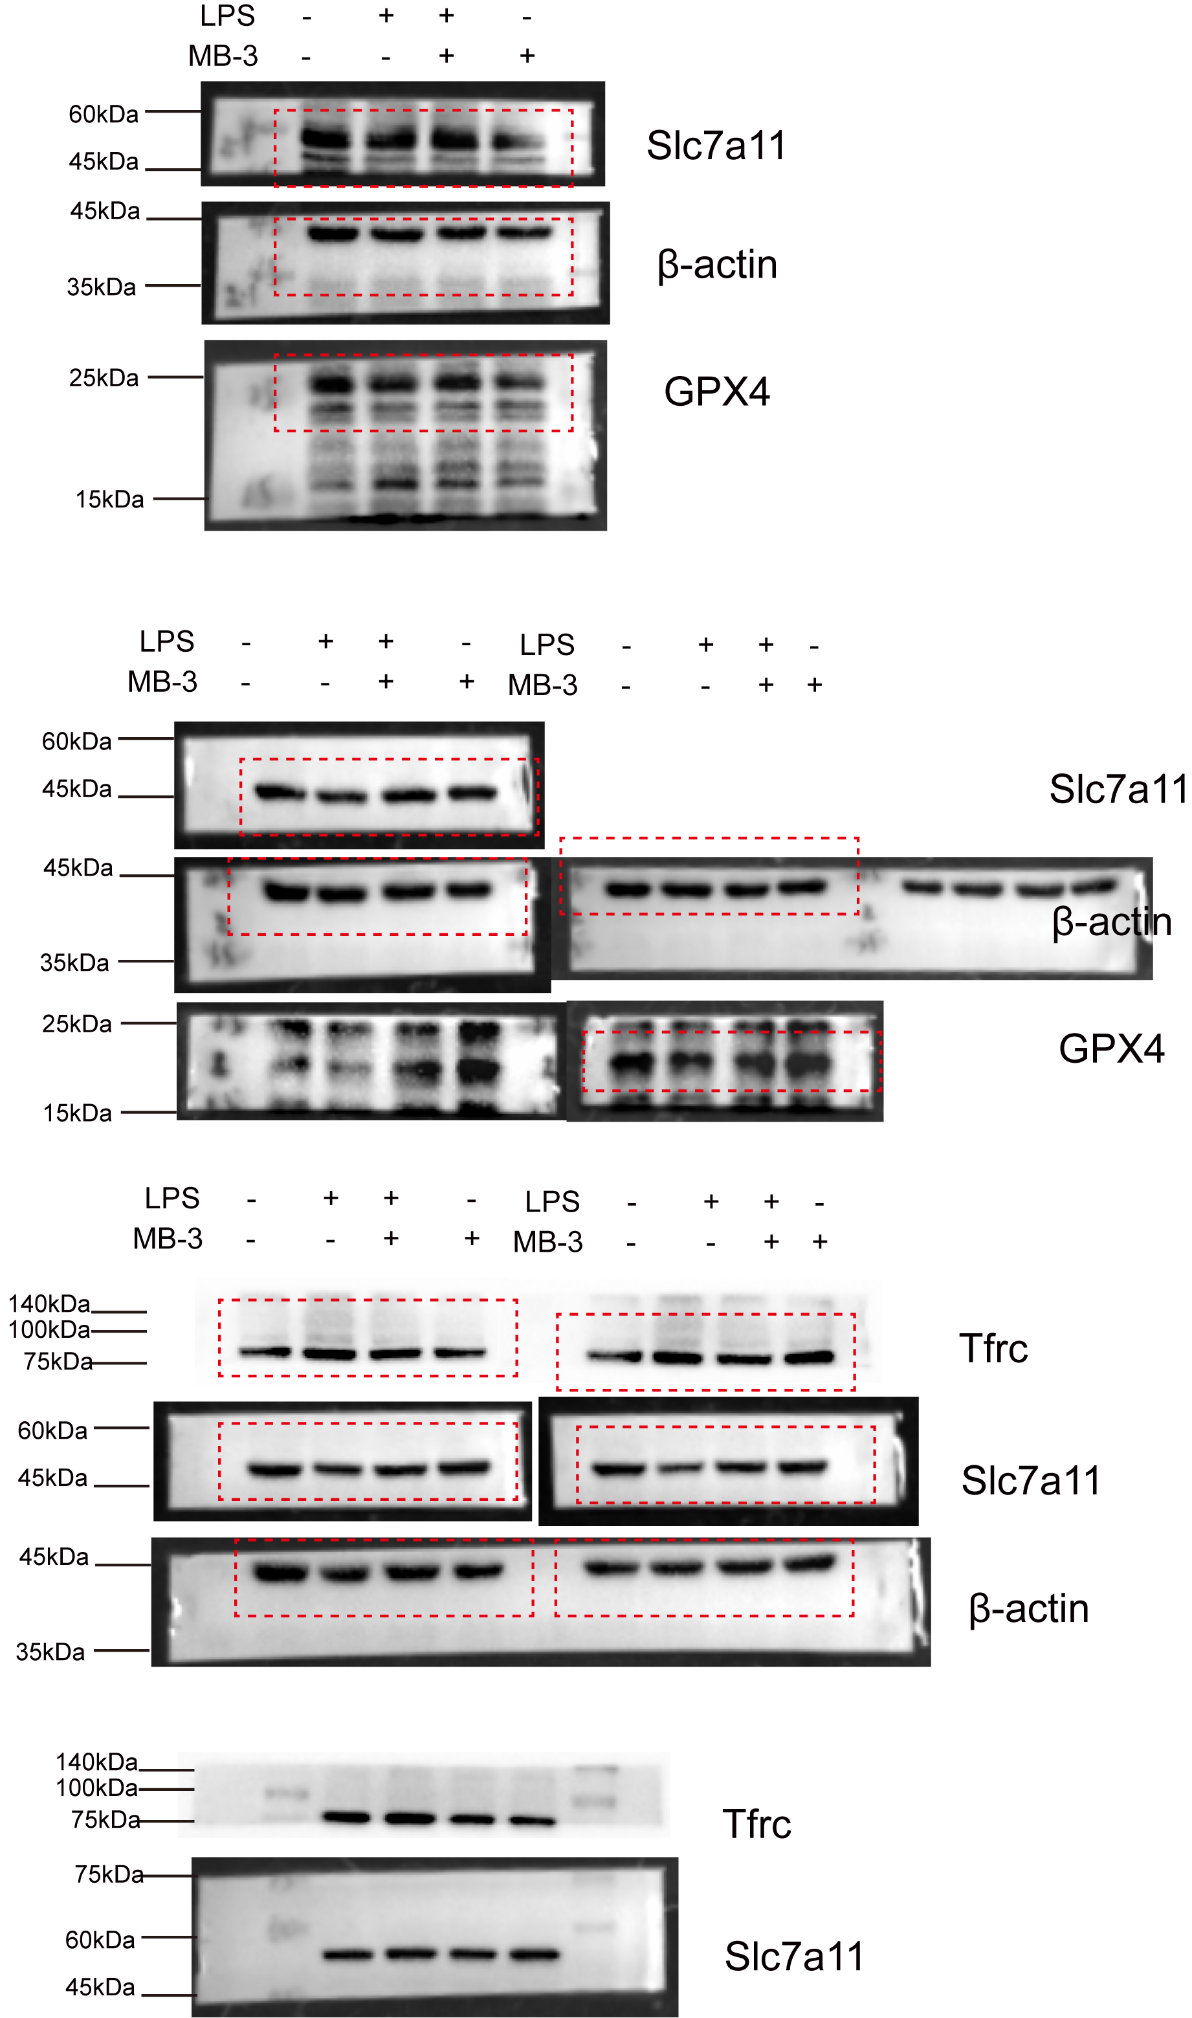


**Unedited original gel diagram for Figure5A-B** WB was conducted to evaluate H3K18la protein levels


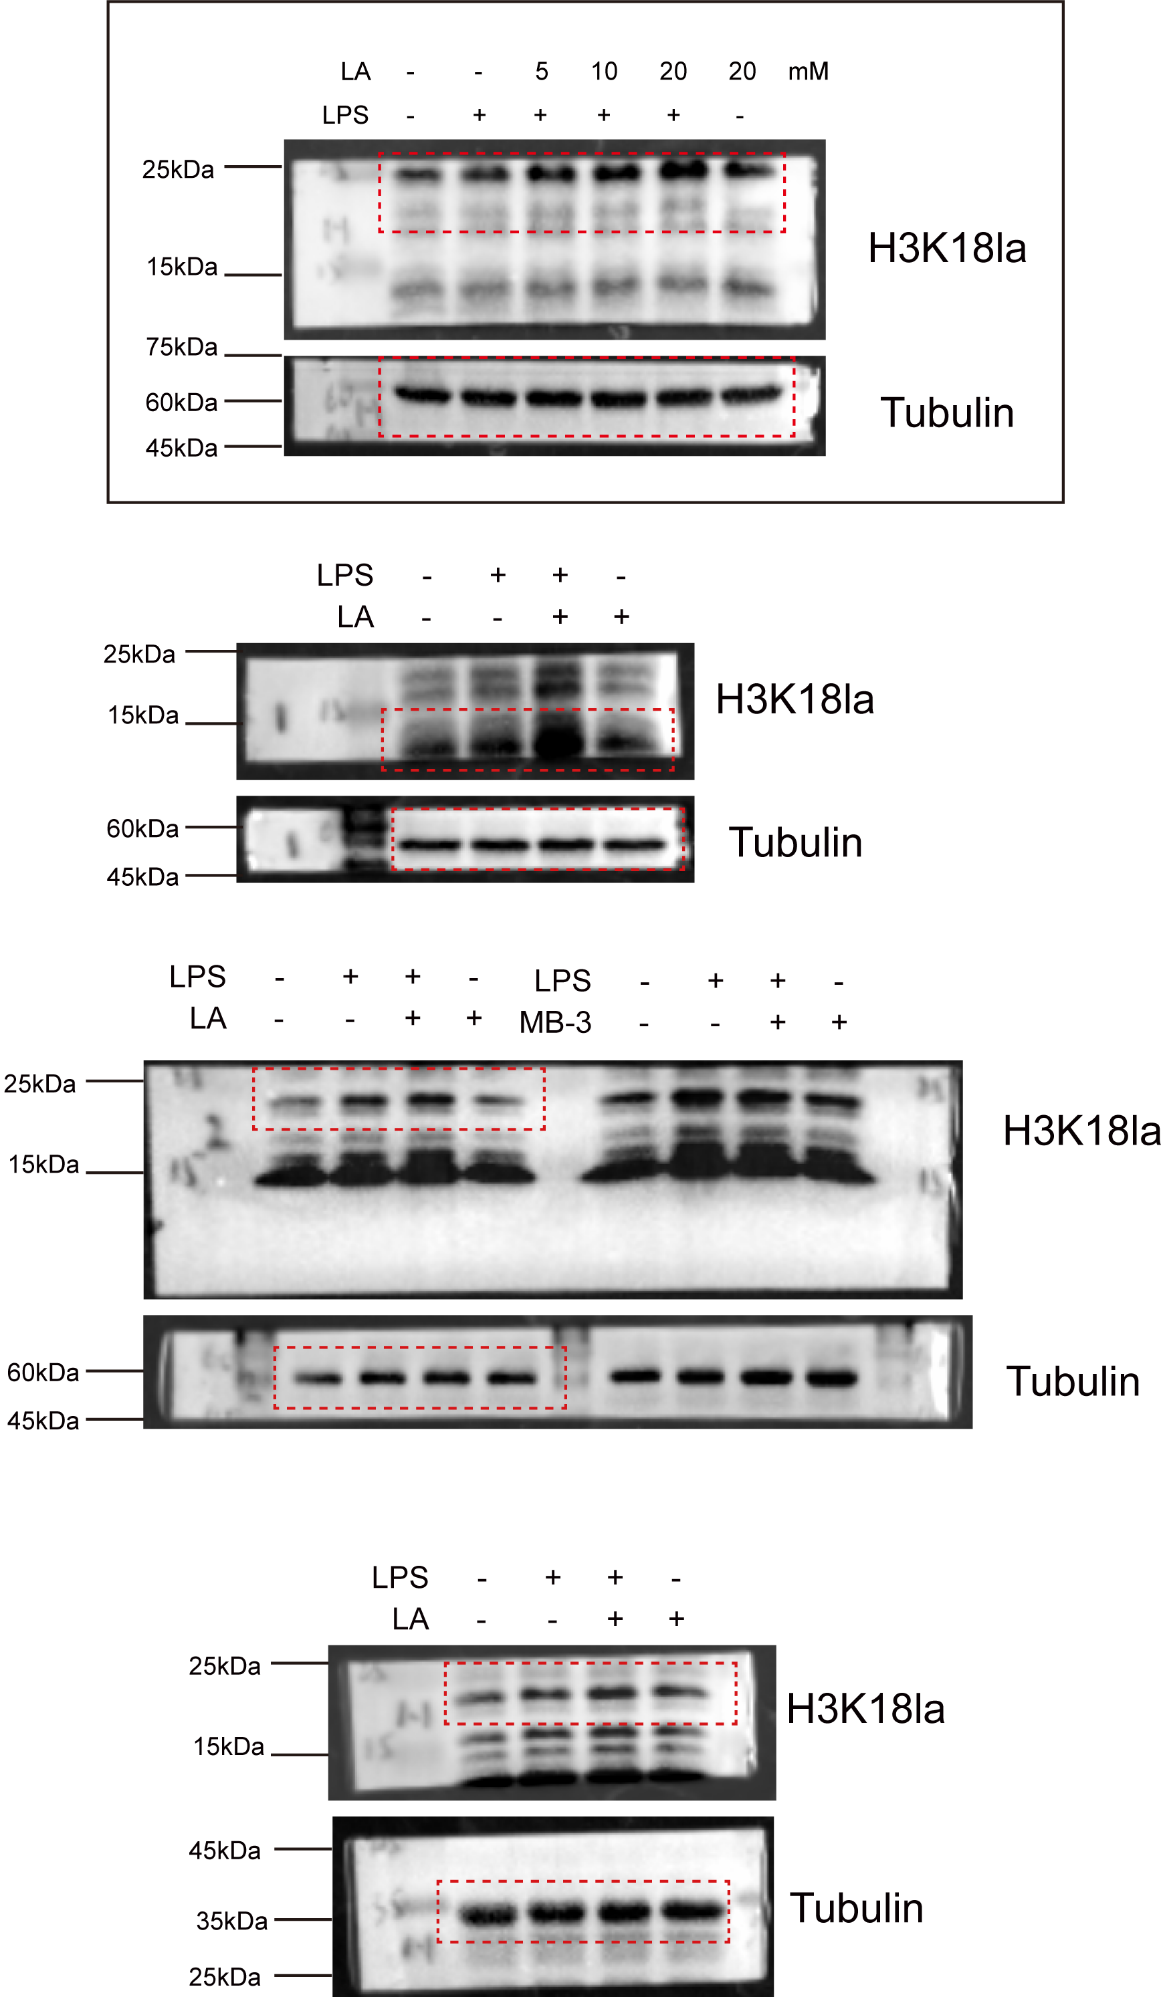


**Unedited original gel diagram for Figure5-C** WB was conducted to evaluate H3K18la protein levels


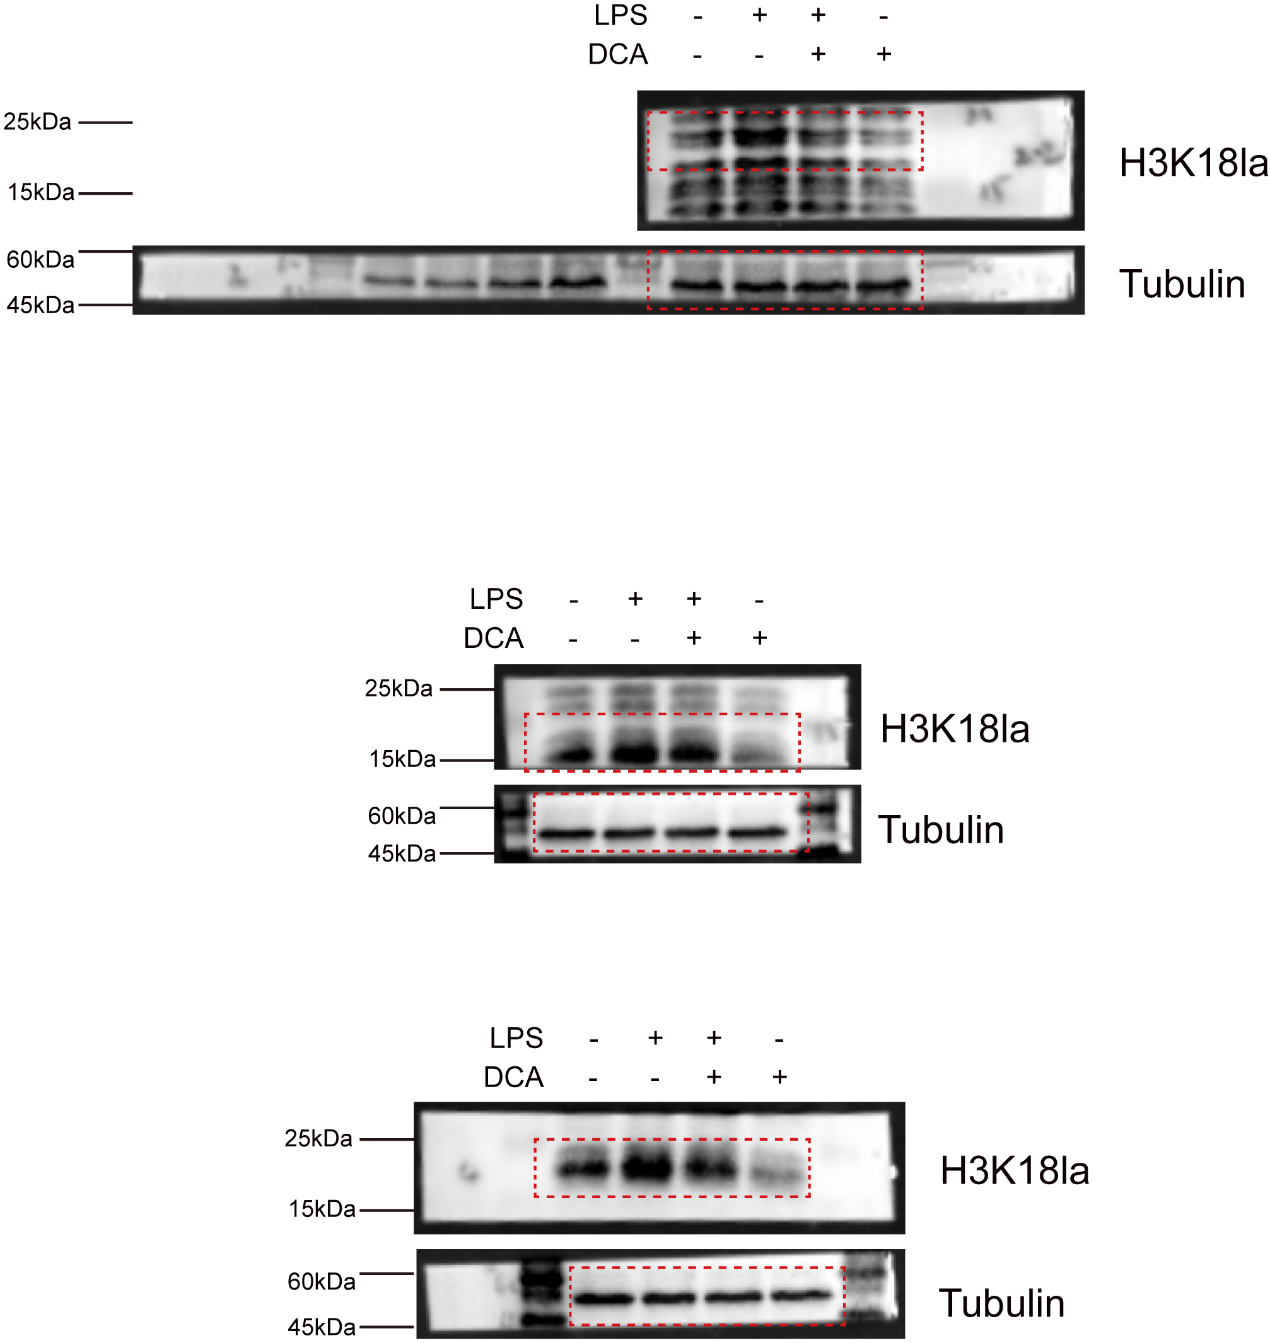


**Unedited original gel diagram for Figure5-D** WB was conducted to evaluate Tfrc、Slc7a11 and GPX4 protein levels


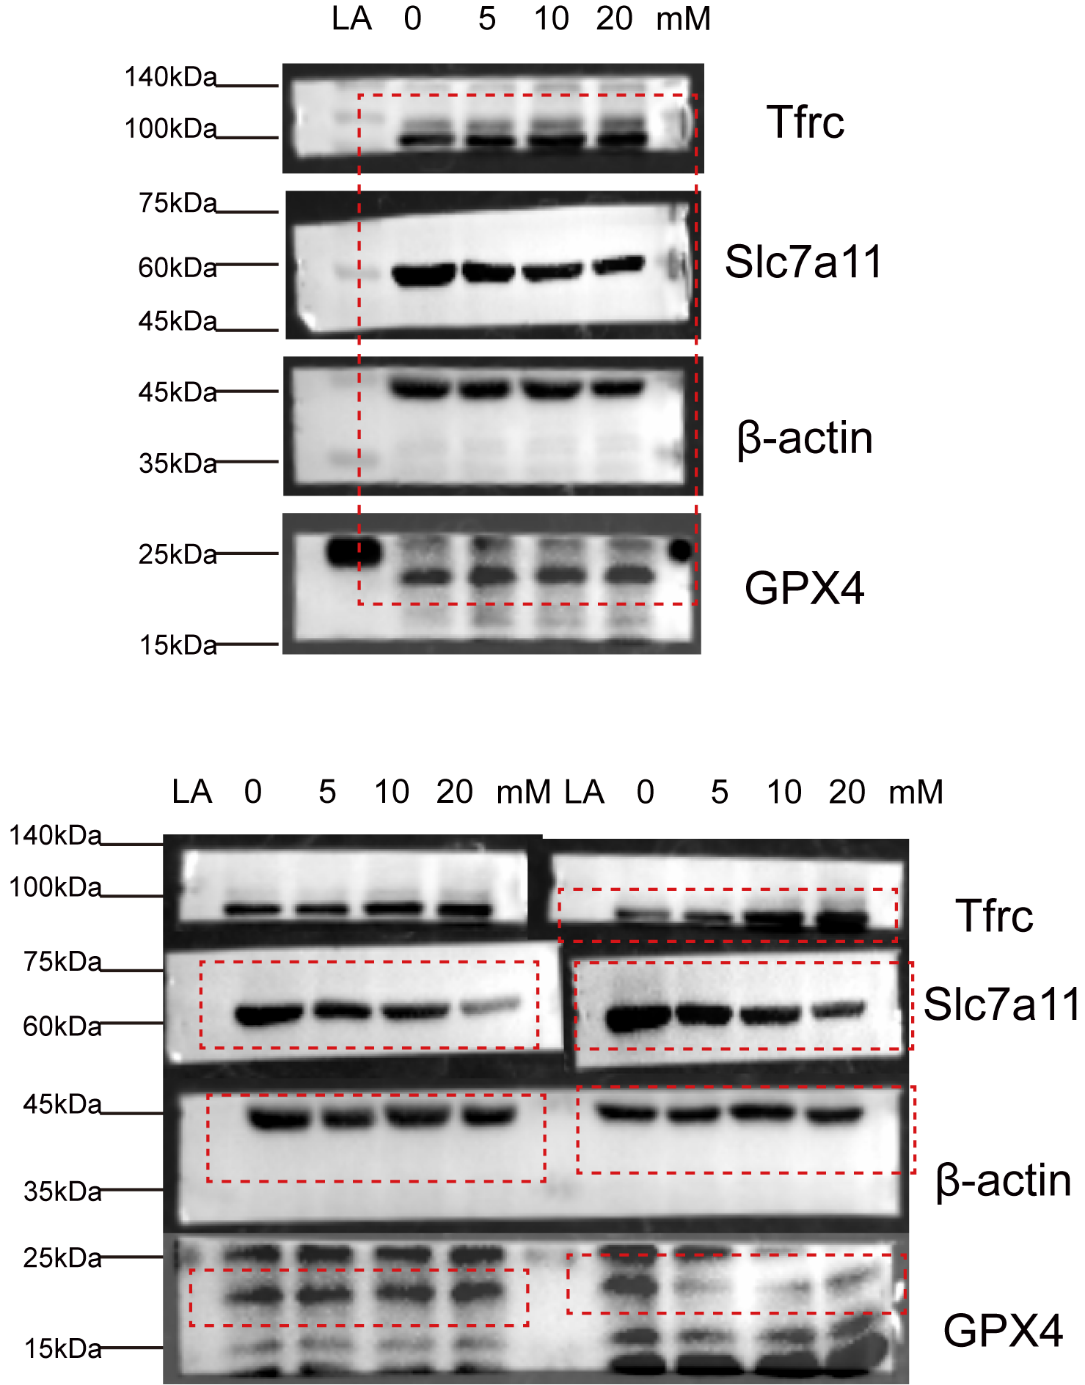


**Unedited original gel diagram for Figure5-F** WB was conducted to evaluate Tfrc、Slc7a11 and GPX4 protein levels


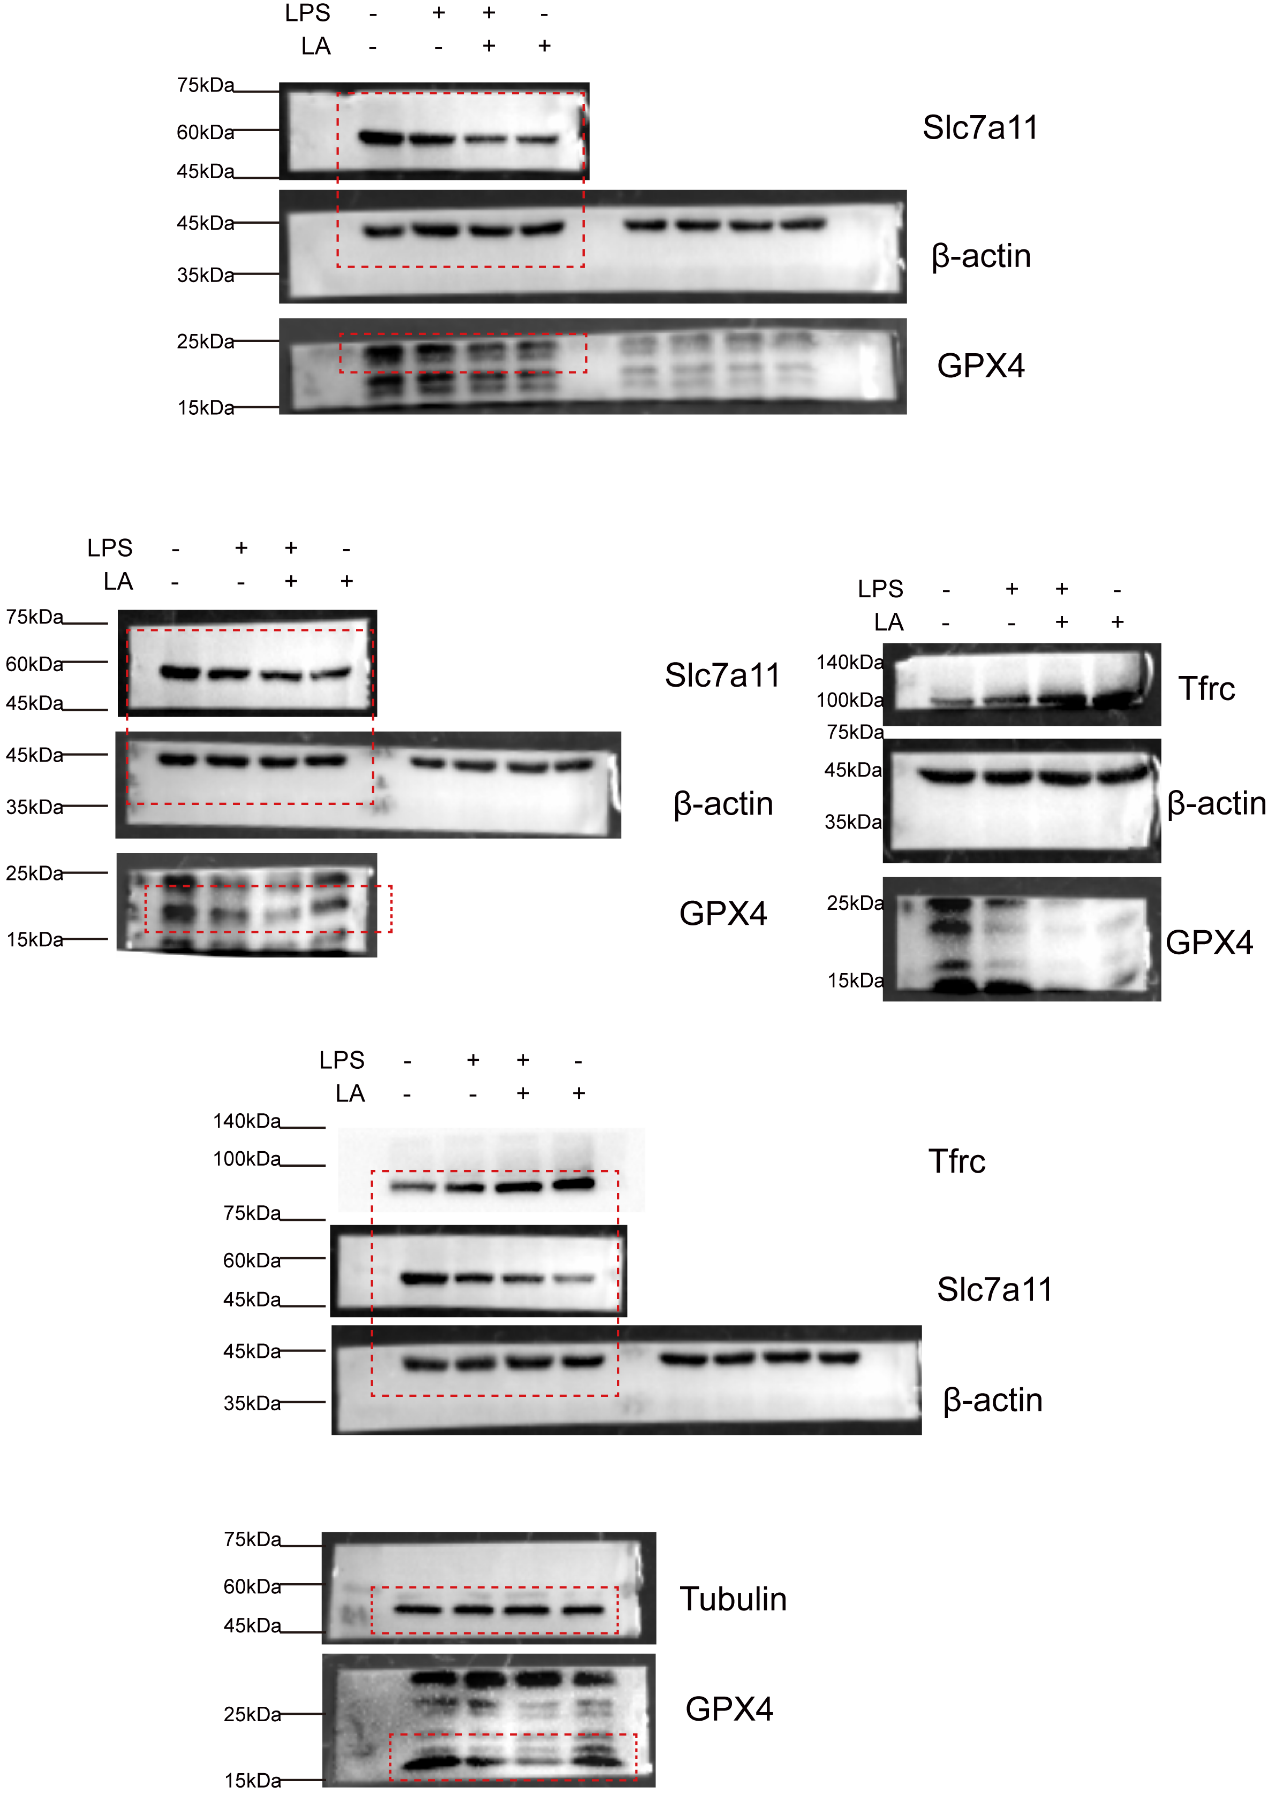


**Unedited original gel diagram for Figure5-J**WB was conducted to evaluate Tfrc、Slc7a11 protein levels


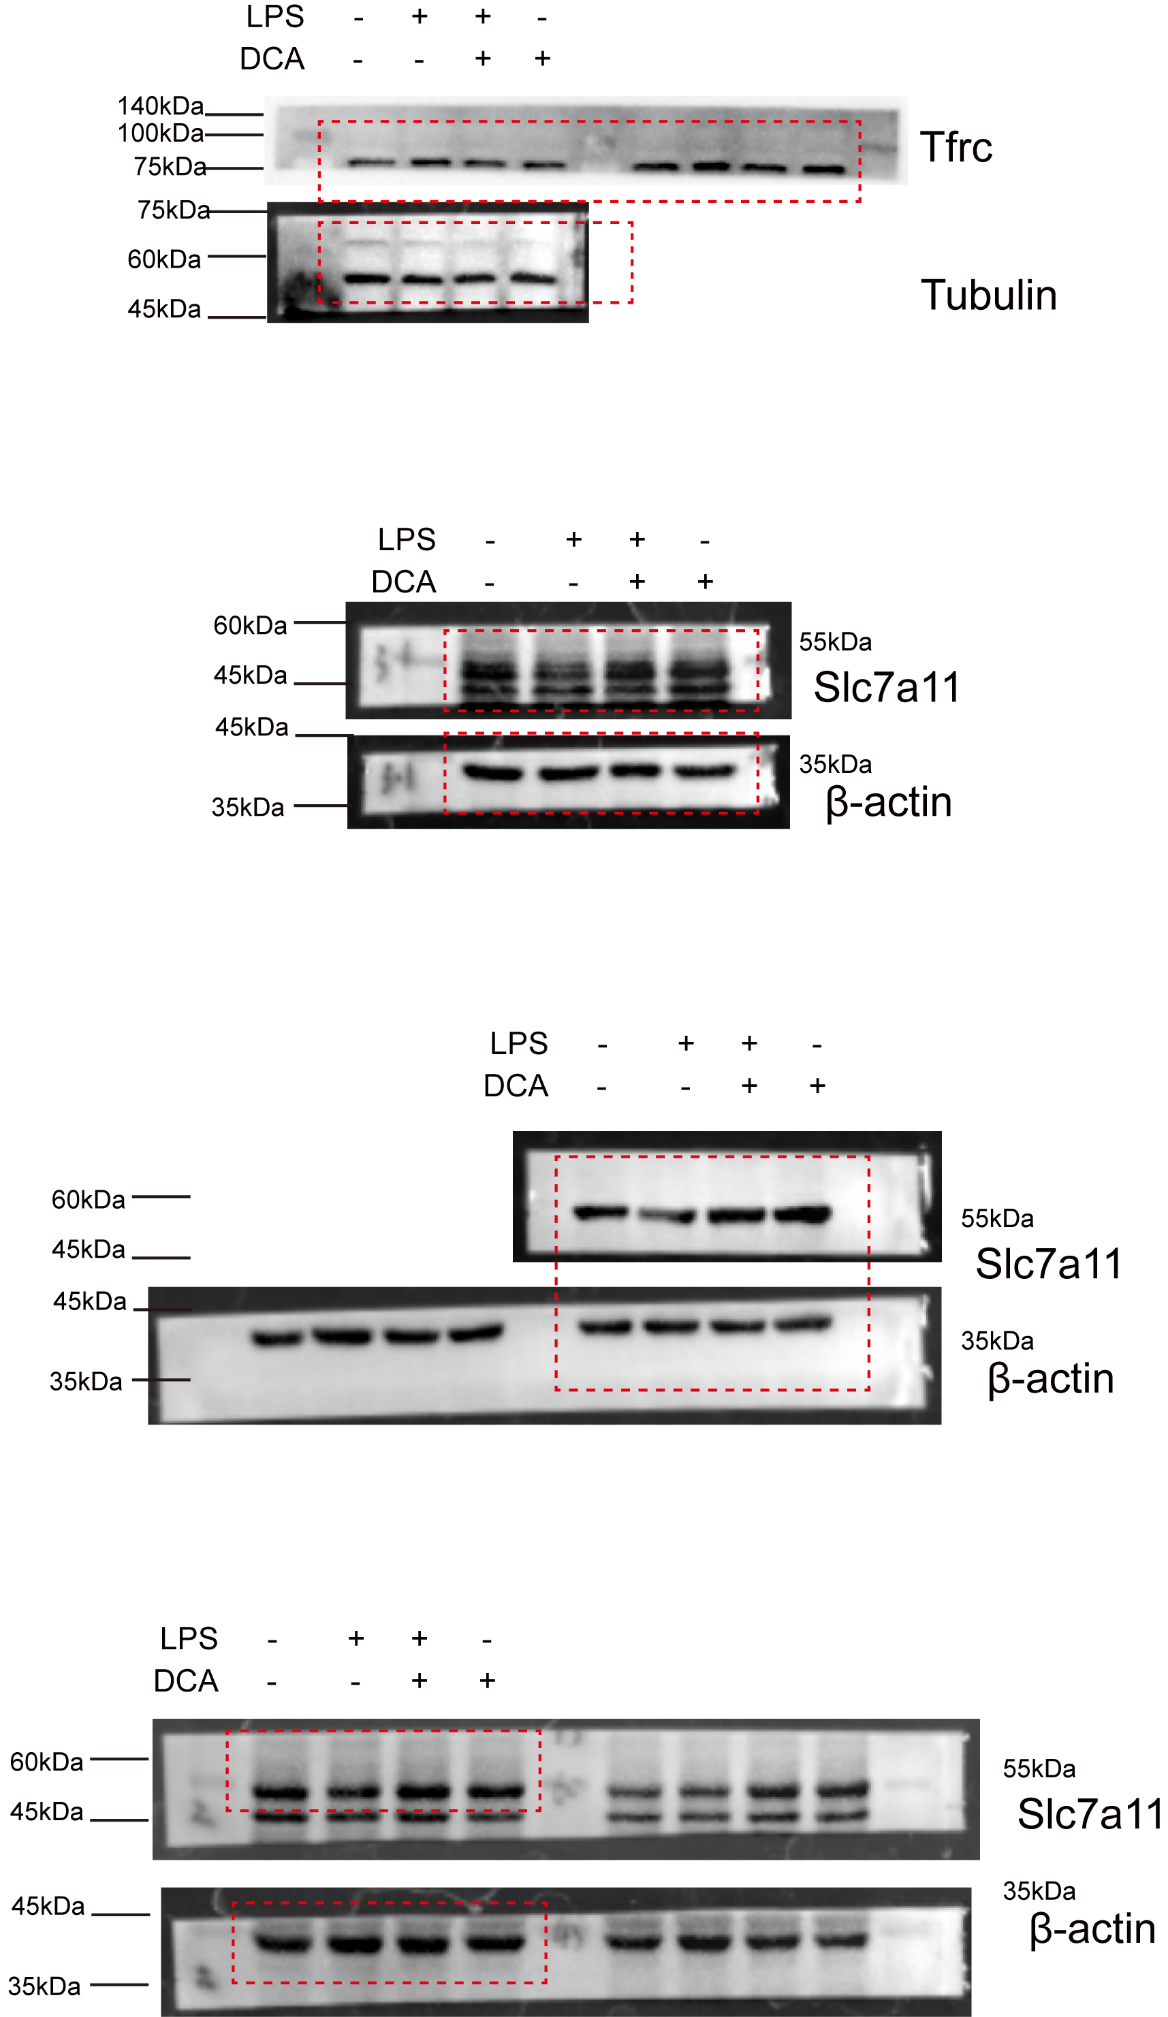


**Unedited original gel diagram for Figure6-C** WB was conducted to evaluate HK2 protein levels


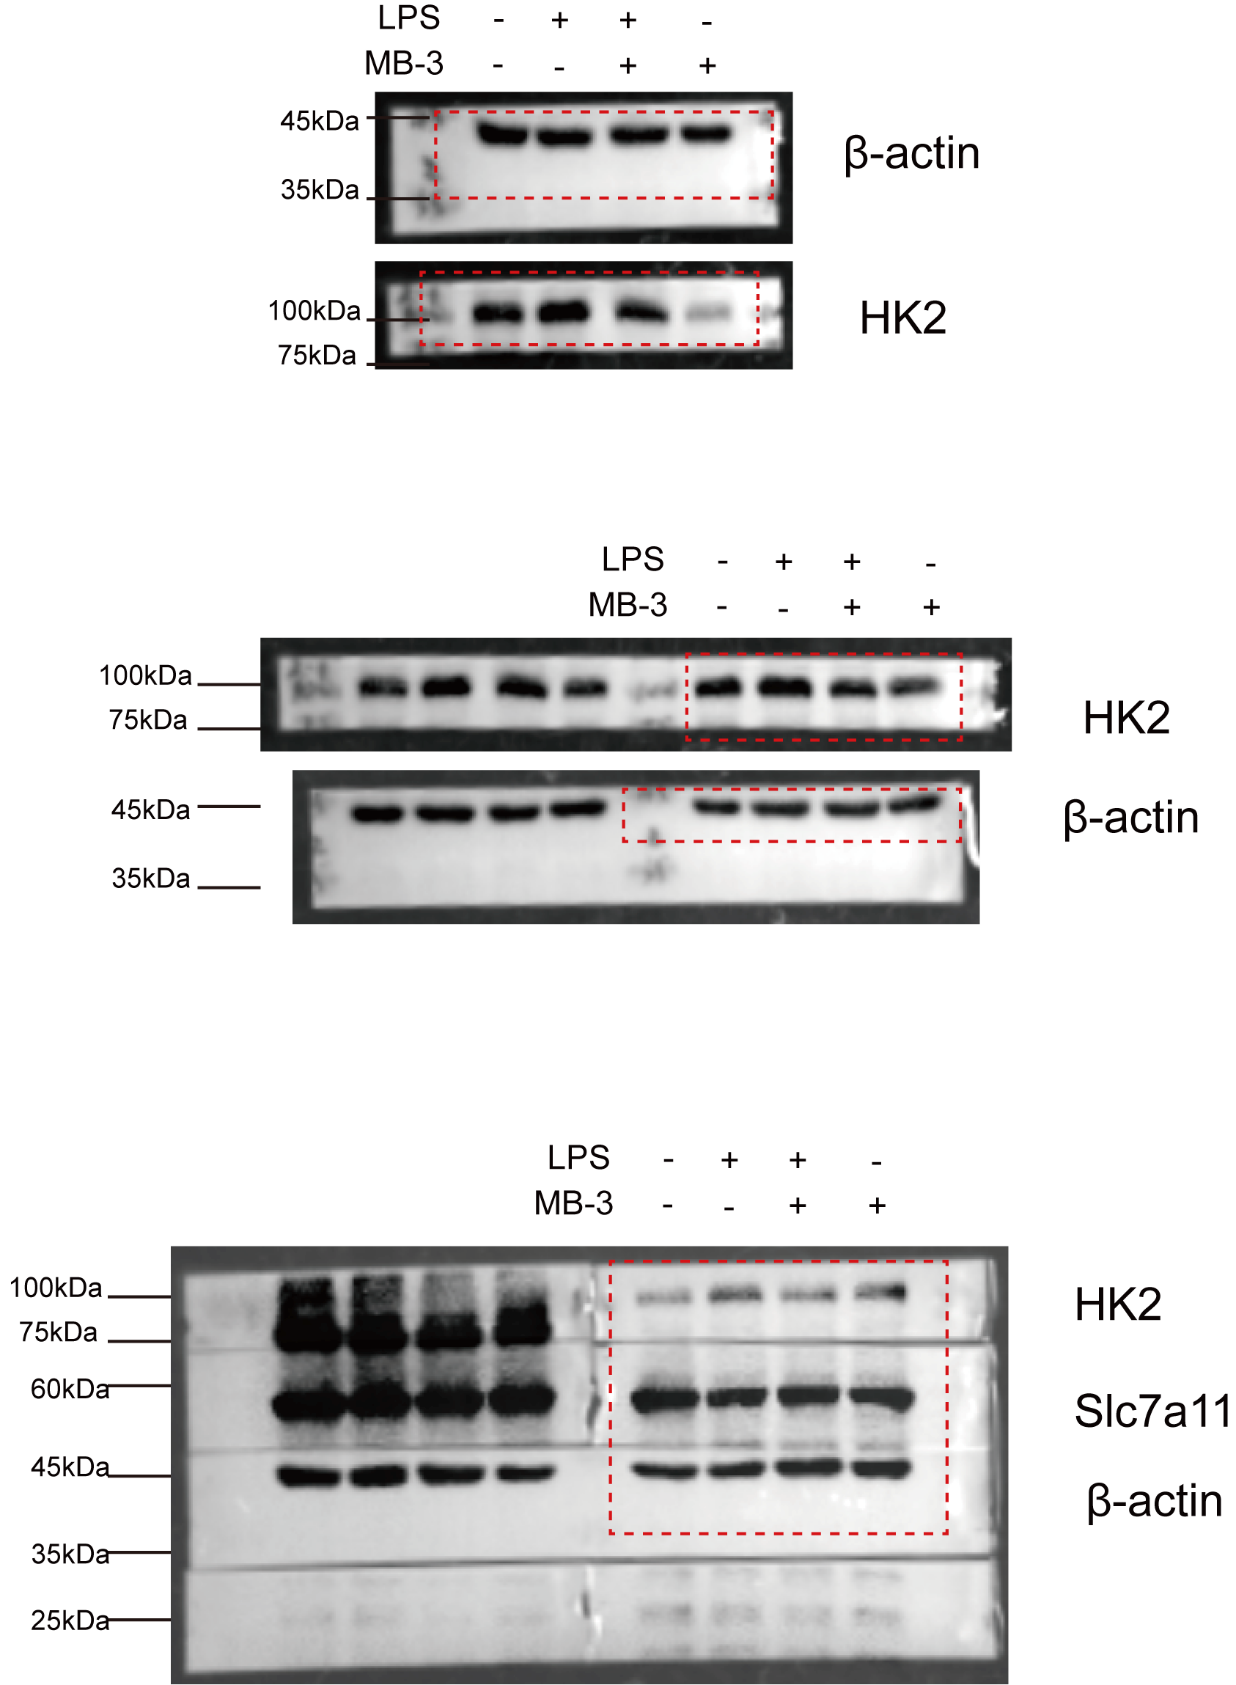


**Unedited original gel diagram for Figure6-I** WB was conducted to evaluate Tfrc、Slc7a11 and GPX4 protein levels


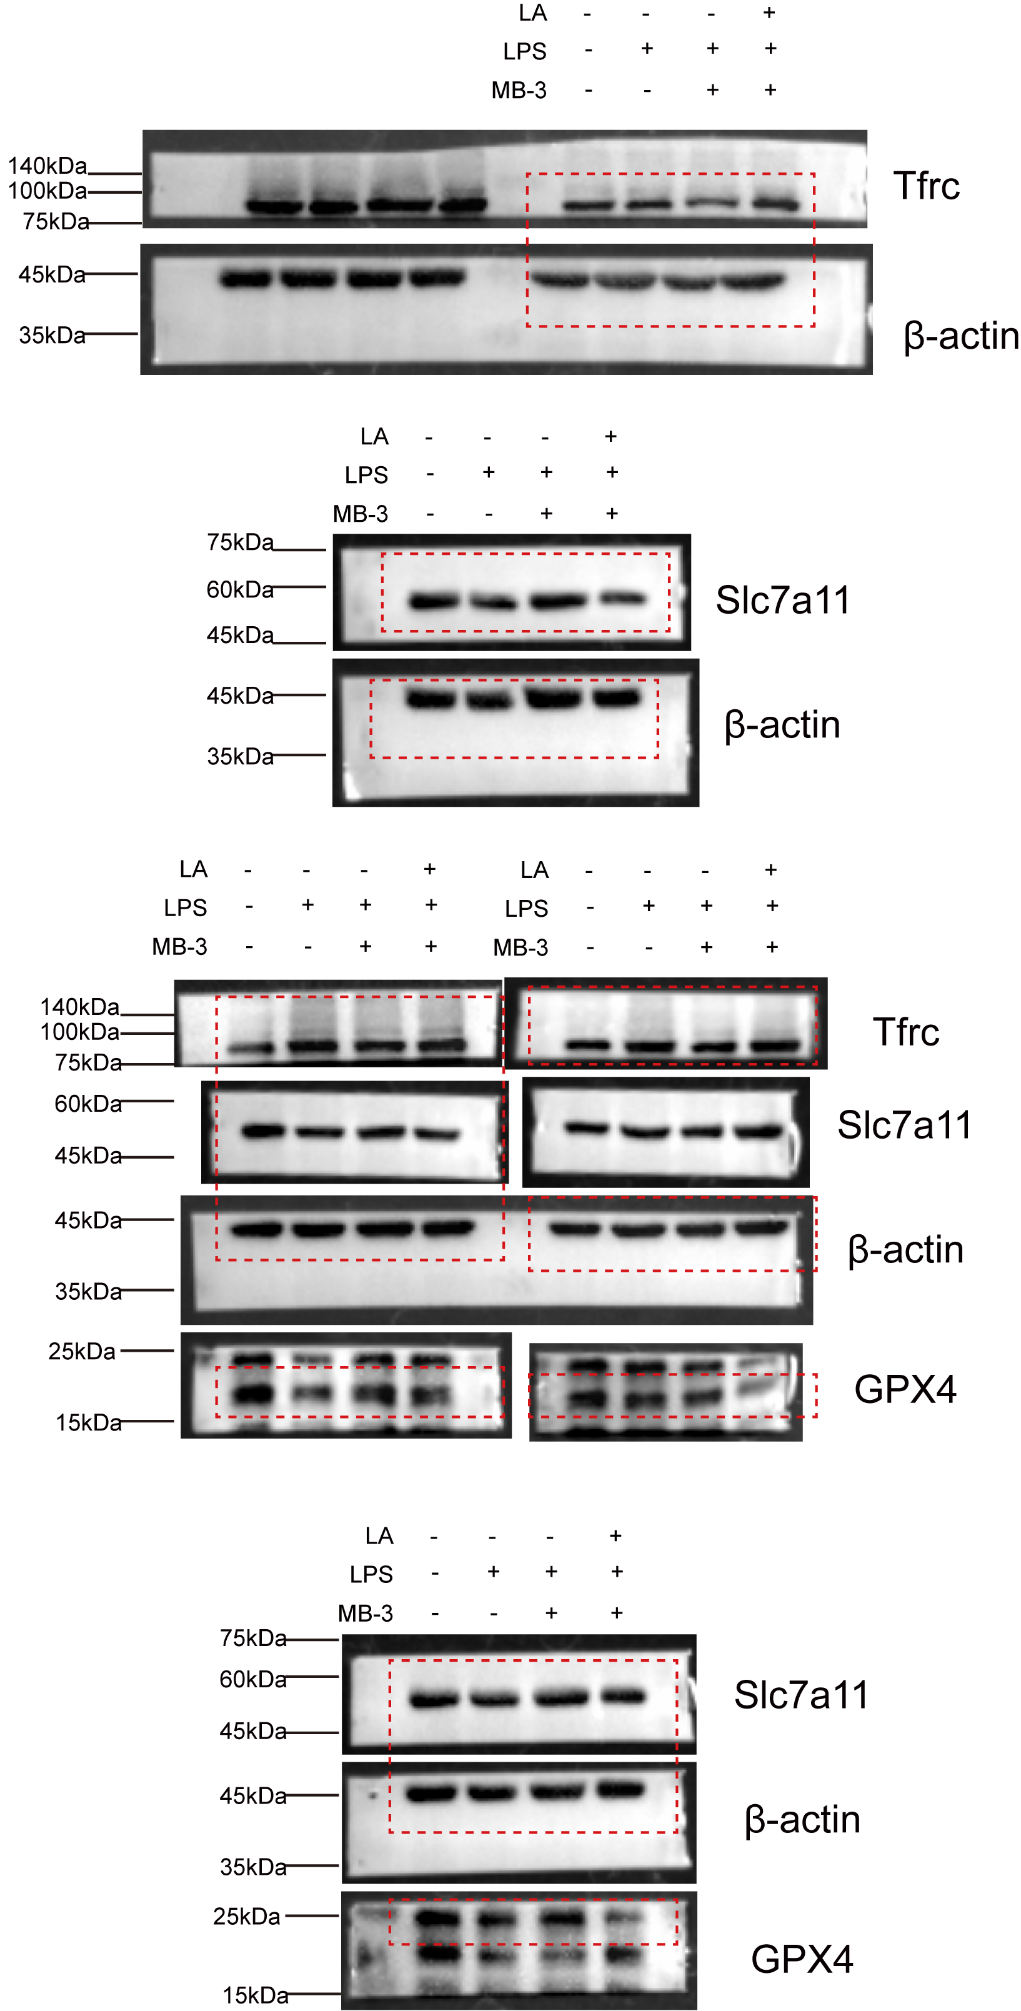


**Unedited original gel diagram for FigureS2-A** WB was conducted to evaluate CH25H protein levels


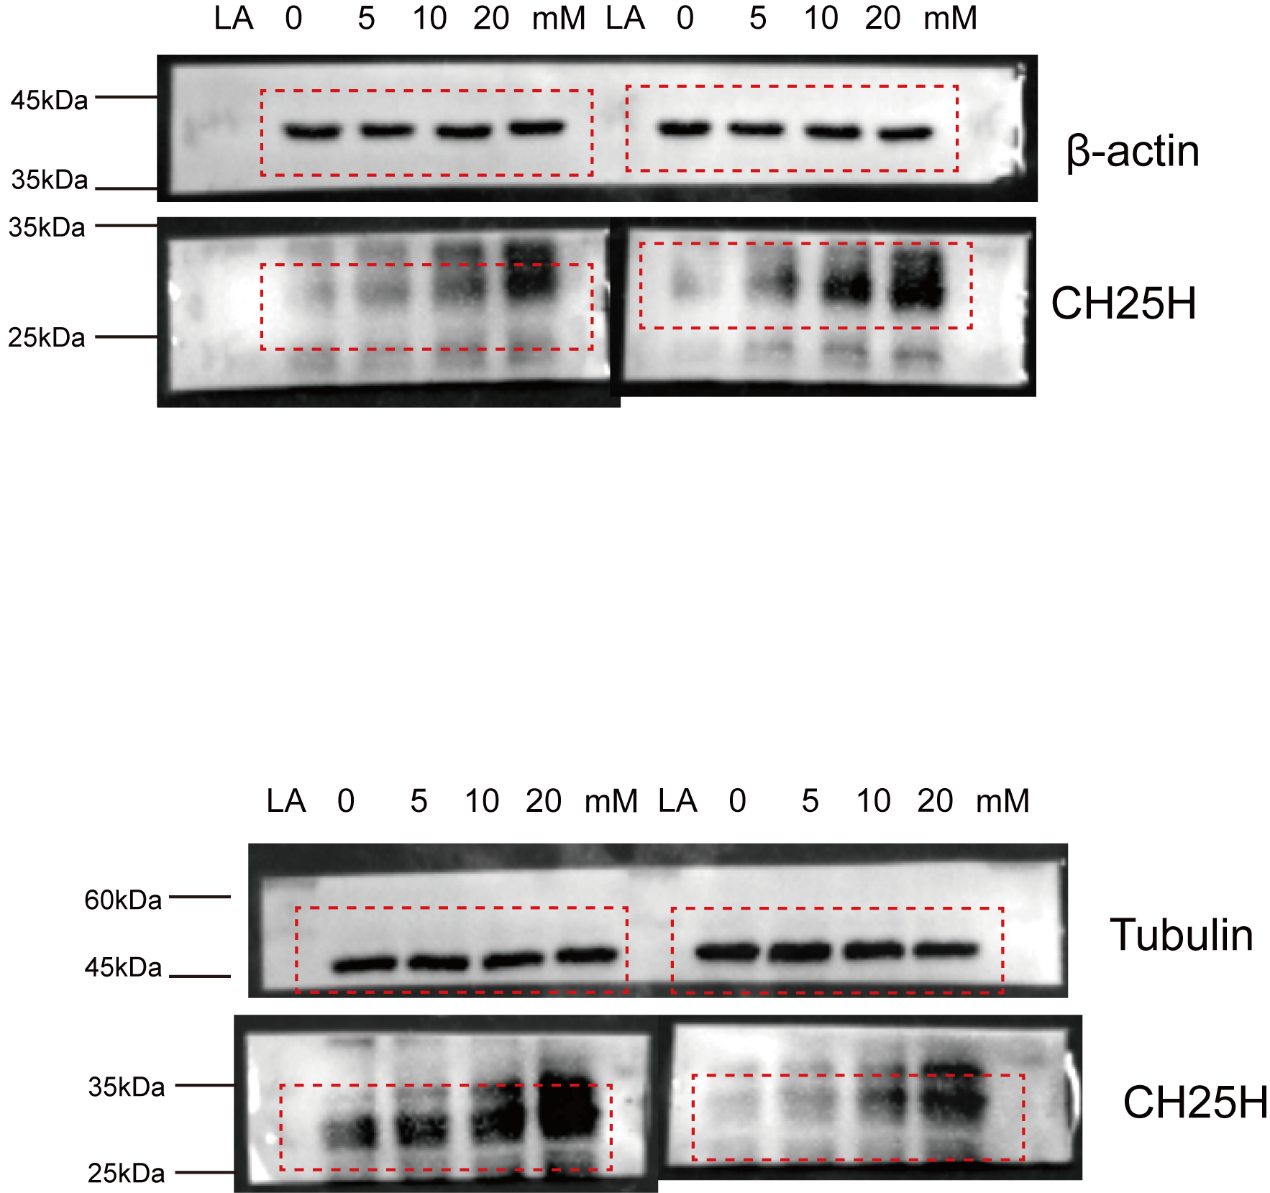


**Unedited original gel diagram for FigureS2-C** WB was conducted to evaluate CH25H protein levels


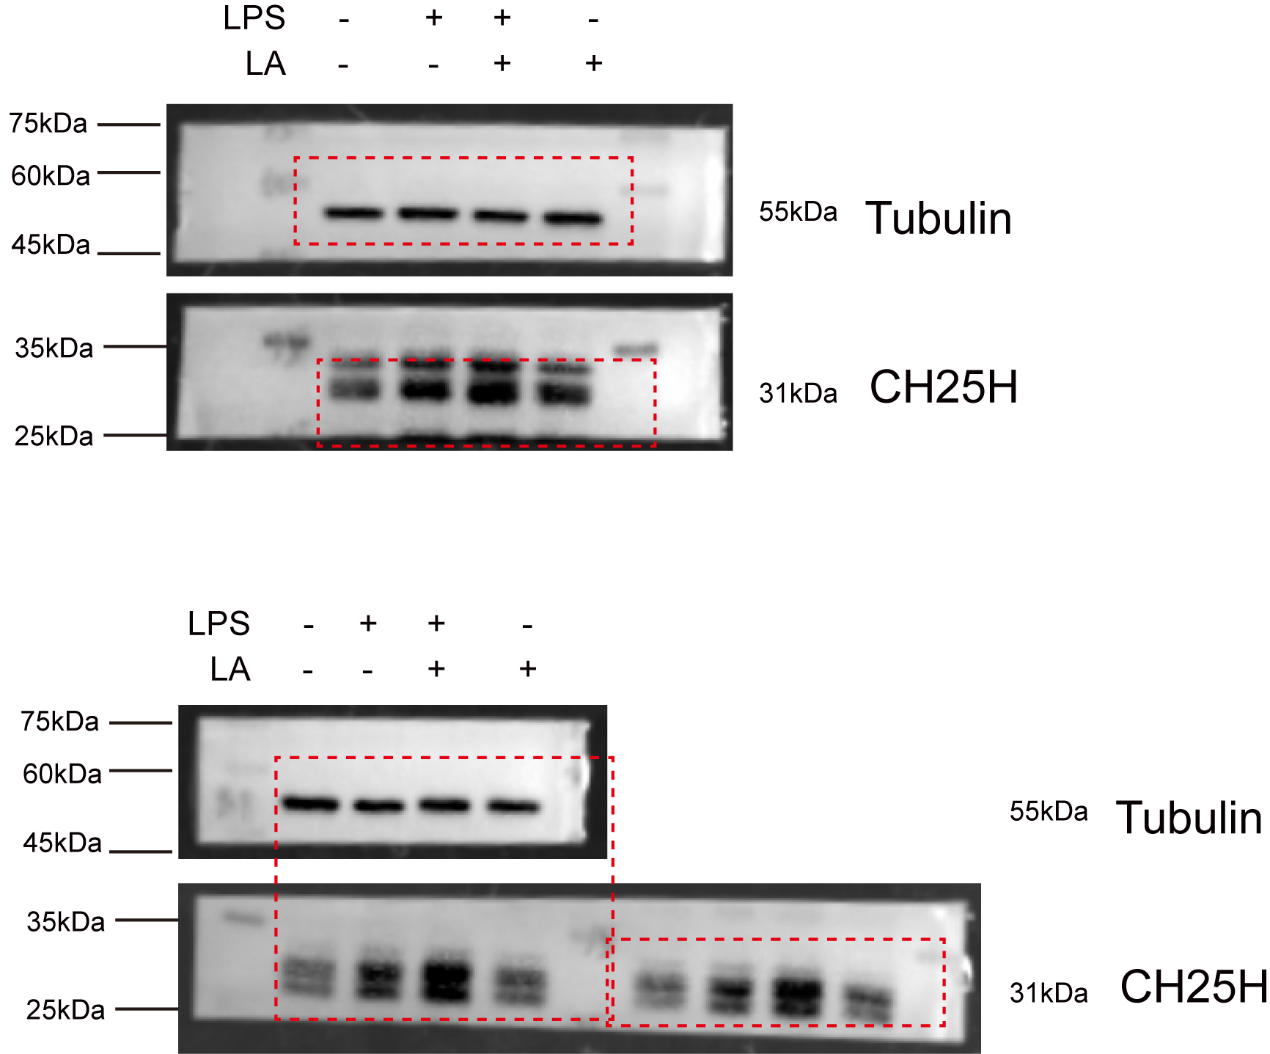


**Unedited original gel diagram for FigureS2-D** WB was conducted to evaluate CH25H protein levels


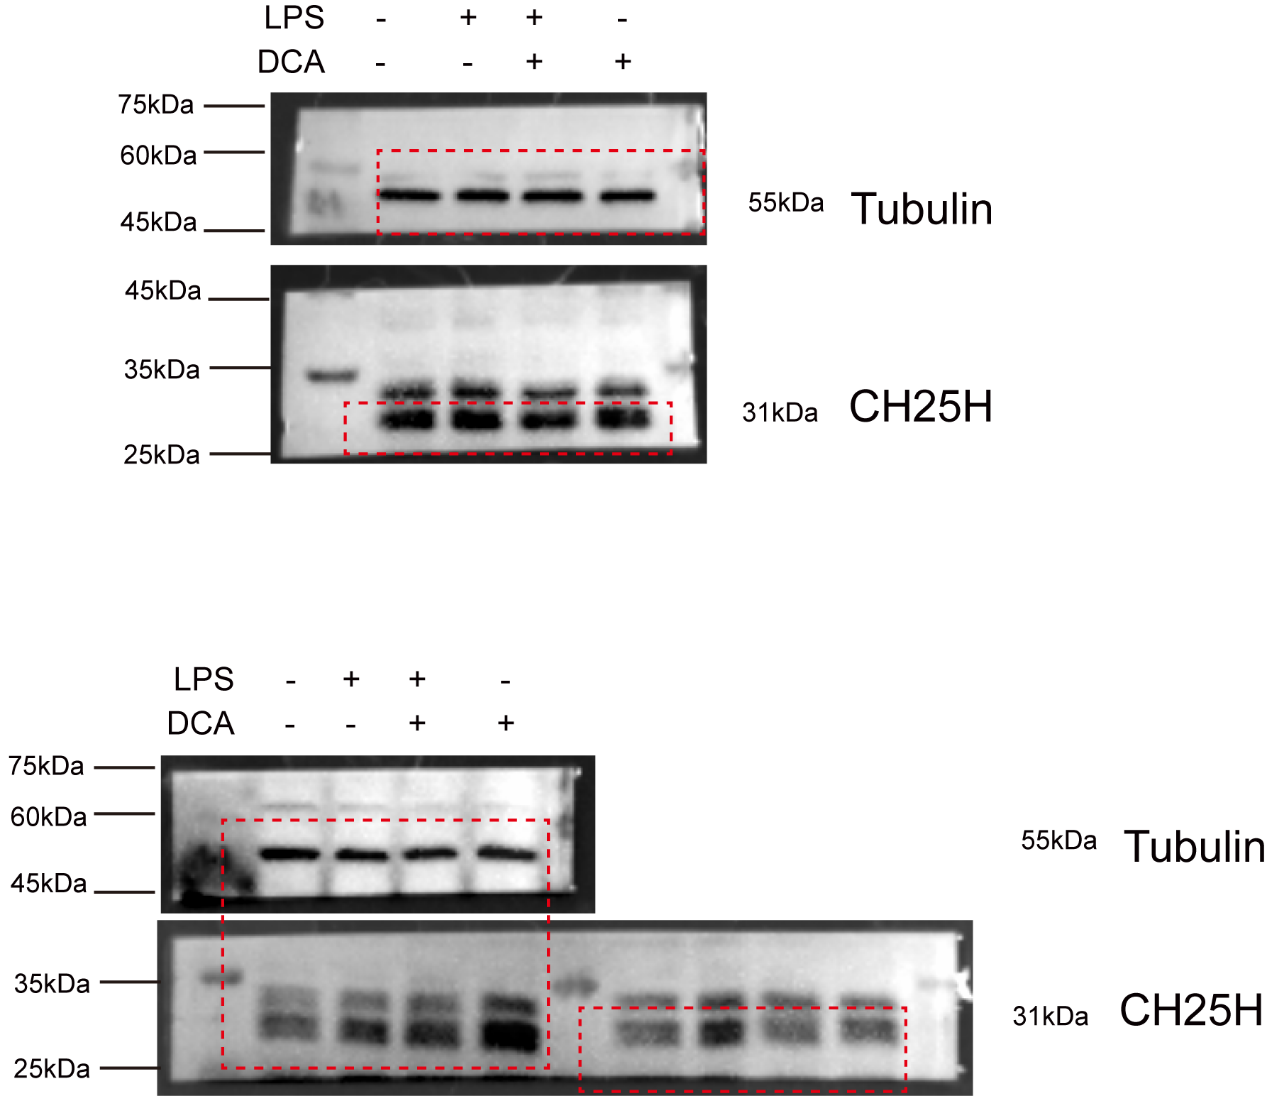

Supplement: Supplementary file 1 [file 967ab0299d603370d4bac02a.docx]
